# Supplementary material
Source: PubMed Central journal article supplement (PMC3147976)
Supplement: supp_85_16_8270__1.pdf [file supp_85_16_8270__1.pdf]

Table 1. Glycopeptide Compositions of B.700010040.C9 gp140 ΔC obtained from LC/ESI-FTICR MS Analysis

| Env Domain | Charge State | Experimental m/z | Theoretical m/z | Mass Error (ppm)                                                | Peptide Sequence                    | Glycan Composition             |
|------------|--------------|------------------|-----------------|-----------------------------------------------------------------|-------------------------------------|--------------------------------|
| C1         | 4+           | 1146.9956        | 1147.0221       | 23                                                              | NVTENFNMWENN MVEQMHEDIISLWDQSLKPCVK | [HexNAc]2                      |
|            | 4+           | 1410.6348        | 1410.6146       | 14                                                              | NVTENFNMWENN MVEQMHEDIISLWDQSLKPCVK | [Hex]4[HexNAc]4                |
|            | 4+           | 1497.8631        | 1497.8989       | 24                                                              | NVTENFNMWENN MVEQMHEDIISLWDQSLKPCVK | [Hex]4[HexNAc]5[Fuc]1          |
|            | 4+           | 1451.1252        | 1451.1278       | 2                                                               | NVTENFNMWENN MVEQMHEDIISLWDQSLKPCVK | [Hex]5[HexNAc]4                |
|            | 4+           | 1487.6355        | 1487.6423       | 5                                                               | NVTENFNMWENN MVEQMHEDIISLWDQSLKPCVK | [Hex]5[HexNAc]4[Fuc]1          |
|            | 4+           | 1560.4801        | 1560.4161       | 41                                                              | NVTENFNMWENN MVEQMHEDIISLWDQSLKPCVK | [Hex]5[HexNAc]4[Fuc]1[NeuNAc]1 |
|            | 4+           | 1523.8874        | 1523.9017       | 9                                                               | NVTENFNMWENN MVEQMHEDIISLWDQSLKPCVK | [Hex]5[HexNAc]4[NeuNAc]1       |
|            | 4+           | 1501.9201        | 1501.8977       | 15                                                              | NVTENFNMWENN MVEQMHEDIISLWDQSLKPCVK | [Hex]5[HexNAc]5                |
|            | 4+           | 1538.4445        | 1538.4121       | 21                                                              | NVTENFNMWENN MVEQMHEDIISLWDQSLKPCVK | [Hex]5[HexNAc]5[Fuc]1          |
|            | 4+           | 1552.6714        | 1552.6675       | 3                                                               | NVTENFNMWENN MVEQMHEDIISLWDQSLKPCVK | [Hex]5[HexNAc]6                |
|            | 4+           | 1564.4305        | 1564.4149       | 10                                                              | NVTENFNMWENN MVEQMHEDIISLWDQSLKPCVK | [Hex]6[HexNAc]4[NeuNAc]1       |
|            | 4+           | 1542.4202        | 1542.4109       | 6                                                               | NVTENFNMWENN MVEQMHEDIISLWDQSLKPCVK | [Hex]6[HexNAc]5                |
|            | 4+           | 1615.1600        | 1615.1847       | 15                                                              | NVTENFNMWENN MVEQMHEDIISLWDQSLKPCVK | [Hex]6[HexNAc]5[NeuNAc]1       |
|            | 4+           | 1593.2045        | 1593.1807       | 15                                                              | NVTENFNMWENN MVEQMHEDIISLWDQSLKPCVK | [Hex]6[HexNAc]6                |
|            | 4+           | 1629.6368        | 1629.6952       | 36                                                              | NVTENFNMWENN MVEQMHEDIISLWDQSLKPCVK | [Hex]6[HexNAc]6[Fuc]1          |
|            | 5+           | 1186.9636        | 1186.9122       | 43                                                              | NVTENFNMWENN MVEQMHEDIISLWDQSLKPCVK | [Hex]4[HexNAc]4[NeuNAc]1       |
|            | 5+           | 1169.3042        | 1169.3090       | 4                                                               | NVTENFNMWENN MVEQMHEDIISLWDQSLKPCVK | [Hex]4[HexNAc]5                |
|            | 5+           | 1201.6976        | 1201.7196       | 18                                                              | NVTENFNMWENN MVEQMHEDIISLWDQSLKPCVK | [Hex]5[HexNAc]5                |
|            | 5+           | 1318.1748        | 1318.1577       | 13                                                              | NVTENFNMWENN MVEQMHEDIISLWDQSLKPCVK | [Hex]5[HexNAc]5[NeuNAc]2       |
|            | 5+           | 1242.3164        | 1242.3355       | 15                                                              | NVTENFNMWENN MVEQMHEDIISLWDQSLKPCVK | [Hex]5[HexNAc]6                |
| 5+         | 1309.9142    | 1309.9524        | 29              | NVTENFNMWENN MVEQMHEDIISLWDQSLKPCVK                             | [Hex]6[HexNAc]4[NeuNAc]2            |                                |
| 5+         | 1234.1303    | 1234.1301        | 0.2             | NVTENFNMWENN MVEQMHEDIISLWDQSLKPCVK                             | [Hex]6[HexNAc]5                     |                                |
| 5+         | 1292.3759    | 1292.3492        | 21              | NVTENFNMWENN MVEQMHEDIISLWDQSLKPCVK                             | [Hex]6[HexNAc]5[NeuNAc]1            |                                |
| 5+         | 1274.7588    | 1274.7460        | 10              | NVTENFNMWENN MVEQMHEDIISLWDQSLKPCVK                             | [Hex]6[HexNAc]6                     |                                |
| 5+         | 1303.9596    | 1303.9576        | 2               | NVTENFNMWENN MVEQMHEDIISLWDQSLKPCVK                             | [Hex]6[HexNAc]6[Fuc]1               |                                |
| 5+         | 1315.3625    | 1315.3619        | 0.5             | NVTENFNMWENN MVEQMHEDIISLWDQSLKPCVK                             | [Hex]6[HexNAc]7                     |                                |
| 5+         | 1355.9663    | 1355.9778        | 8               | NVTENFNMWENN MVEQMHEDIISLWDQSLKPCVK                             | [Hex]6[HexNAc]8                     |                                |
| 5+         | 1347.7501    | 1347.7725        | 17              | NVTENFNMWENN MVEQMHEDIISLWDQSLKPCVK                             | [Hex]7[HexNAc]7                     |                                |
| 5+         | 1714.6314    | 1714.5622        | 40              | AYDTEAHNVWATHACVPTDPNPQEVELKNVTENFNMWENN MVEQMHEDIISLWDQSLKPCVK | [Hex]5[HexNAc]2                     |                                |
| 5+         | 1755.2262    | 1755.1780        | 27              | AYDTEAHNVWATHACVPTDPNPQEVELKNVTENFNMWENN MVEQMHEDIISLWDQSLKPCVK | [Hex]5[HexNAc]3                     |                                |
| 5+         | 1787.4573    | 1787.5886        | 73              | AYDTEAHNVWATHACVPTDPNPQEVELKNVTENFNMWENN MVEQMHEDIISLWDQSLKPCVK | [Hex]6[HexNAc]3                     |                                |
| 5+         | 1898.1187    | 1898.0320        | 46              | AYDTEAHNVWATHACVPTDPNPQEVELKNVTENFNMWENN MVEQMHEDIISLWDQSLKPCVK | [Hex]6[HexNAc]5[Fuc]1               |                                |
| 6+         | 1588.7072    | 1588.6989        | 5               | AYDTEAHNVWATHACVPTDPNPQEVELKNVTENFNMWENN MVEQMHEDIISLWDQSLKPCVK | [Hex]5[HexNAc]6[Fuc]1               |                                |
| 6+         | 1581.9144    | 1581.8612        | 34              | AYDTEAHNVWATHACVPTDPNPQEVELKNVTENFNMWENN MVEQMHEDIISLWDQSLKPCVK | [Hex]6[HexNAc]5[Fuc]1               |                                |
| 6+         | 1676.6531    | 1676.5631        | 54              | AYDTEAHNVWATHACVPTDPNPQEVELKNVTENFNMWENN MVEQMHEDIISLWDQSLKPCVK | [Hex]7[HexNAc]7[Fuc]1               |                                |
| V1-V2      | 1+           | 655.2873         | 655.2868        | 1                                                               | NCSFK                               | non-glycosylated               |
|            | 1+           | 858.3669         | 858.3661        | 1                                                               | NCSFK                               | [HexNAc]                       |
|            | 1+           | 1061.4498        | 1061.4456       | 4                                                               | NCSFK                               | [HexNAc]2                      |
|            | 2+           | 774.3042         | 774.3056        | 2                                                               | NCSFK                               | [Hex]3[HexNAc]2                |
|            | 2+           | 855.3319         | 855.3321        | 0.2                                                             | NCSFK                               | [Hex]4[HexNAc]2                |

| Env Domain | Charge State | Experimental m/z | Theoretical m/z | Mass Error (ppm) | Peptide Sequence | Glycan Composition             |
|------------|--------------|------------------|-----------------|------------------|------------------|--------------------------------|
|            | 2+           | 1203.9307        | 1203.9591       | 24               | NCSFK            | [Hex]4[HexNAc]4[NeuNAc]1       |
|            | 2+           | 1232.9667        | 1232.9800       | 11               | NCSFK            | [Hex]4[HexNAc]5[Fuc]1          |
|            | 2+           | 936.3556         | 936.3584        | 3                | NCSFK            | [Hex]5[HexNAc]2                |
|            | 2+           | 1212.4768        | 1212.4668       | 8                | NCSFK            | [Hex]5[HexNAc]4[Fuc]1          |
|            | 2+           | 1358.0109        | 1358.0145       | 3                | NCSFK            | [Hex]5[HexNAc]4[Fuc]1[NeuNAc]1 |
|            | 2+           | 1314.0138        | 1314.0065       | 6                | NCSFK            | [Hex]5[HexNAc]5[Fuc]1          |
|            | 2+           | 1017.3889        | 1017.3849       | 4                | NCSFK            | [Hex]6[HexNAc]2                |
|            | 2+           | 1118.9250        | 1118.9245       | 0.4              | NCSFK            | [Hex]6[HexNAc]3                |
|            | 2+           | 1191.9770        | 1191.9535       | 20               | NCSFK            | [Hex]6[HexNAc]3[Fuc]1          |
|            | 2+           | 1220.4708        | 1220.4642       | 5                | NCSFK            | [Hex]6[HexNAc]4                |
|            | 2+           | 1098.4180        | 1098.4113       | 6                | NCSFK            | [Hex]7[HexNAc]2                |
|            | 2+           | 1179.4379        | 1179.4377       | 0.2              | NCSFK            | [Hex]8[HexNAc]2                |
|            |              |                  |                 |                  |                  |                                |
| V2         | 1+           | 1344.7196        | 1344.7006       | 14               | LDVVPINDTR       | [HexNAc]                       |
|            | 1+           | 1490.7829        | 1490.7585       | 16               | LDVVPINDTR       | [HexNAc][Fuc]                  |
|            |              |                  |                 |                  |                  |                                |
|            | 2+           | 1220.5647        | 1220.5522       | 10               | LDVVPINDTR       | [Hex]3[HexNAc]4                |
|            | 2+           | 1293.5991        | 1293.5811       | 14               | LDVVPINDTR       | [Hex]3[HexNAc]4[Fuc]1          |
|            | 2+           | 1395.1039        | 1395.1209       | 12               | LDVVPINDTR       | [Hex]3[HexNAc]5[Fuc]1          |
|            | 2+           | 1496.6630        | 1496.6606       | 2                | LDVVPINDTR       | [Hex]3[HexNAc]6[Fuc]1          |
|            | 2+           | 1273.0593        | 1273.0679       | 7                | LDVVPINDTR       | [Hex]4[HexNAc]3[Fuc]1          |
|            | 2+           | 1301.5616        | 1301.5786       | 13               | LDVVPINDTR       | [Hex]4[HexNAc]4                |
|            | 2+           | 1374.6001        | 1374.6076       | 5                | LDVVPINDTR       | [Hex]4[HexNAc]4 [Fuc]1         |
|            | 2+           | 1520.1599        | 1520.1553       | 3                | LDVVPINDTR       | [Hex]4[HexNAc]4[Fuc]1[NeuNAc]1 |
|            | 2+           | 1447.1295        | 1447.1263       | 2                | LDVVPINDTR       | [Hex]4[HexNAc]4[NeuNAc]1       |
|            | 2+           | 1476.1500        | 1476.1472       | 2                | LDVVPINDTR       | [Hex]4[HexNAc]5[Fuc]1          |
|            | 2+           | 1621.6880        | 1621.6950       | 4                | LDVVPINDTR       | [Hex]4[HexNAc]5[Fuc]1[NeuNAc]1 |
|            | 2+           | 1548.6709        | 1548.6660       | 3                | LDVVPINDTR       | [Hex]4[HexNAc]5[NeuNAc]1       |
|            | 2+           | 1179.5252        | 1179.5256       | 0.3              | LDVVPINDTR       | [Hex]5[HexNAc]2                |
|            | 2+           | 1281.0676        | 1281.0653       | 2                | LDVVPINDTR       | [Hex]5[HexNAc]3                |
|            | 2+           | 1354.0865        | 1354.0943       | 6                | LDVVPINDTR       | [Hex]5[HexNAc]3[Fuc]1          |
|            | 2+           | 1382.5984        | 1382.6050       | 5                | LDVVPINDTR       | [Hex]5[HexNAc]4                |
|            | 2+           | 1528.0775        | 1528.1527       | 49               | LDVVPINDTR       | [Hex]5[HexNAc]4 [NeuNAc]1      |
|            | 2+           | 1455.6338        | 1455.6340       | 0.1              | LDVVPINDTR       | [Hex]5[HexNAc]4[Fuc]1          |
|            | 2+           | 1601.1771        | 1601.1817       | 3                | LDVVPINDTR       | [Hex]5[HexNAc]4[Fuc]1[NeuNAc]1 |
|            | 2+           | 1746.7469        | 1746.7294       | 10               | LDVVPINDTR       | [Hex]5[HexNAc]4[Fuc]1[NeuNAc]2 |
|            | 2+           | 1557.1775        | 1557.1737       | 2                | LDVVPINDTR       | [Hex]5[HexNAc]5[Fuc]1          |
|            | 2+           | 1702.7267        | 1702.7214       | 3                | LDVVPINDTR       | [Hex]5[HexNAc]5[Fuc]1[NeuNAc]1 |
|            | 2+           | 1629.7038        | 1629.6924       | 7                | LDVVPINDTR       | [Hex]5[HexNAc]5[NeuNAc]1       |
|            | 2+           | 1775.2537        | 1775.2401       | 8                | LDVVPINDTR       | [Hex]5[HexNAc]5[NeuNAc]2       |
|            | 2+           | 1585.7132        | 1585.6844       | 18               | LDVVPINDTR       | [Hex]5[HexNAc]6                |
|            | 2+           | 1658.7223        | 1658.7133       | 5                | LDVVPINDTR       | [Hex]5[HexNAc]6[Fuc]1          |
|            | 2+           | 1804.3204        | 1804.2610       | 33               | LDVVPINDTR       | [Hex]5[HexNAc]6[Fuc]1[NeuNAc]1 |
|            | 2+           | 1760.2373        | 1760.2530       | 9                | LDVVPINDTR       | [Hex]5[HexNAc]7[Fuc]1          |
|            | 2+           | 1260.5483        | 1260.5521       | 3                | LDVVPINDTR       | [Hex]6[HexNAc]2                |
|            | 2+           | 1362.0861        | 1362.0917       | 4                | LDVVPINDTR       | [Hex]6[HexNAc]3                |
|            | 2+           | 1435.1153        | 1435.1207       | 4                | LDVVPINDTR       | [Hex]6[HexNAc]3[Fuc]1          |
|            | 2+           | 1507.6688        | 1507.6394       | 20               | LDVVPINDTR       | [Hex]6[HexNAc]3[NeuNAc]1       |
|            | 2+           | 1463.6648        | 1463.6314       | 23               | LDVVPINDTR       | [Hex]6[HexNAc]4                |
|            | 2+           | 1638.1993        | 1638.2001       | 0.5              | LDVVPINDTR       | [Hex]6[HexNAc]5[Fuc]1          |
|            | 2+           | 1783.7592        | 1783.7478       | 6                | LDVVPINDTR       | [Hex]6[HexNAc]5[Fuc]1[NeuNAc]1 |

| Env Domain | Charge State | Experimental m/z | Theoretical m/z | Mass Error (ppm) | Peptide Sequence | Glycan Composition             |
|------------|--------------|------------------|-----------------|------------------|------------------|--------------------------------|
|            | 2+           | 1929.2994        | 1929.2955       | 2                | LDVVPINDTR       | [Hex]6[HexNAc]5[Fuc]1[NeuNAc]2 |
|            | 2+           | 1739.7400        | 1739.7398       | 0.1              | LDVVPINDTR       | [Hex]6[HexNAc]6[Fuc]1          |
|            | 2+           | 1885.2767        | 1885.2875       | 6                | LDVVPINDTR       | [Hex]6[HexNAc]6[Fuc]1[NeuNAc]1 |
|            | 2+           | 1768.3074        | 1768.2505       | 32               | LDVVPINDTR       | [Hex]6[HexNAc]7                |
|            | 2+           | 1841.2916        | 1841.2794       | 7                | LDVVPINDTR       | [Hex]6[HexNAc]7[Fuc]1          |
|            | 2+           | 1617.7224        | 1617.6868       | 22               | LDVVPINDTR       | [Hex]7[HexNAc]4[Fuc]1          |
|            | 2+           | 1791.6819        | 1791.7452       | 35               | LDVVPINDTR       | [Hex]7[HexNAc]5[NeuNAc]1       |
|            | 2+           | 1820.7945        | 1820.7662       | 16               | LDVVPINDTR       | [Hex]7[HexNAc]6[Fuc]1          |
|            | 2+           | 1966.3279        | 1966.3139       | 7                | LDVVPINDTR       | [Hex]7[HexNAc]6[Fuc]1[NeuNAc]1 |
|            | 2+           | 1922.3022        | 1922.3058       | 2                | LDVVPINDTR       | [Hex]7[HexNAc]7[Fuc]1          |
|            | 2+           | 1706.7122        | 1706.7107       | 1                | LDVVPINDTR       | [Hex]9[HexNAc]4                |
|            | 2+           | 1808.2360        | 1808.2503       | 8                | LDVVPINDTR       | [Hex]9[HexNAc]5                |
|            |              |                  |                 |                  |                  |                                |
|            | 3+           | 1232.4780        | 1232.5151       | 30               | LDVVPINDTR       | [Hex]5[HexNAc]5[Fuc]1[NeuNAc]2 |
|            | 3+           | 1189.5218        | 1189.5009       | 18               | LDVVPINDTR       | [Hex]6[HexNAc]5[Fuc]1[NeuNAc]1 |
|            | 3+           | 1257.2134        | 1257.1941       | 15               | LDVVPINDTR       | [Hex]6[HexNAc]6[Fuc]1[NeuNAc]1 |
|            | 3+           | 1451.3207        | 1451.2577       | 43               | LDVVPINDTR       | [Hex]6[HexNAc]6[Fuc]1[NeuNAc]3 |
|            | 3+           | 1421.8979        | 1421.9190       | 15               | LDVVPINDTR       | [Hex]6[HexNAc]7[Fuc]1[NeuNAc]2 |
|            | 3+           | 1295.5295        | 1295.5485       | 15               | LDVVPINDTR       | [Hex]6[HexNAc]8[Fuc]1          |
|            | 3+           | 1408.2538        | 1408.2435       | 7                | LDVVPINDTR       | [Hex]7[HexNAc]6[Fuc]1[NeuNAc]2 |
|            | 3+           | 1281.8812        | 1281.8730       | 6                | LDVVPINDTR       | [Hex]7[HexNAc]7[Fuc]1          |
|            | 3+           | 1378.9171        | 1378.9048       | 9                | LDVVPINDTR       | [Hex]7[HexNAc]7[Fuc]1[NeuNAc]1 |
|            | 3+           | 1475.9534        | 1475.9366       | 11               | LDVVPINDTR       | [Hex]7[HexNAc]7[Fuc]1[NeuNAc]2 |
|            | 3+           | 1573.0275        | 1572.9684       | 38               | LDVVPINDTR       | [Hex]7[HexNAc]7[Fuc]1[NeuNAc]3 |
|            | 3+           | 1494.8802        | 1494.9438       | 43               | LDVVPINDTR       | [Hex]7[HexNAc]8[NeuNAc]2       |
|            |              |                  |                 |                  |                  |                                |
| V2-C2      | 2+           | 839.4223         | 839.4185        | 5                | LVSCNTSVITQACPK  | non-glycosylated               |
|            | 2+           | 940.9690         | 940.9555        | 14               | LVSCNTSVITQACPK  | [HexNAc]                       |
|            | 2+           | 1387.1189        | 1387.1168       | 2                | LVSCNTSVITQACPK  | [Hex]3[HexNAc]3                |
|            | 2+           | 1532.6588        | 1532.6645       | 4                | LVSCNTSVITQACPK  | [Hex]3[HexNAc]3[NeuNAc]1       |
|            | 2+           | 1764.7722        | 1764.7649       | 4                | LVSCNTSVITQACPK  | [Hex]3[HexNAc]6[Fuc]1          |
|            | 2+           | 1366.5903        | 1366.6036       | 10               | LVSCNTSVITQACPK  | [Hex]4[HexNAc]2                |
|            | 2+           | 1468.1422        | 1468.1432       | 1                | LVSCNTSVITQACPK  | [Hex]4[HexNAc]3                |
|            | 2+           | 1541.1689        | 1541.1722       | 2                | LVSCNTSVITQACPK  | [Hex]4[HexNAc]3[Fuc]1          |
|            | 2+           | 1642.7217        | 1642.7119       | 6                | LVSCNTSVITQACPK  | [Hex]4[HexNAc]4 [Fuc]1         |
|            | 2+           | 1715.2295        | 1715.2306       | 1                | LVSCNTSVITQACPK  | [Hex]4[HexNAc]4[NeuNAc]1       |
|            | 2+           | 1744.2375        | 1744.2515       | 8                | LVSCNTSVITQACPK  | [Hex]4[HexNAc]5[Fuc]1          |
|            | 2+           | 1889.8428        | 1889.7993       | 23               | LVSCNTSVITQACPK  | [Hex]4[HexNAc]5[Fuc]1[NeuNAc]1 |
|            | 2+           | 1549.1629        | 1549.1696       | 4                | LVSCNTSVITQACPK  | [Hex]5 [HexNAc]3               |
|            | 2+           | 1796.2924        | 1796.2570       | 20               | LVSCNTSVITQACPK  | [Hex]5 [HexNAc]4 [NeuNAc]1     |
|            | 2+           | 1447.6273        | 1447.6299       | 2                | LVSCNTSVITQACPK  | [Hex]5[HexNAc]2                |
|            | 2+           | 1622.1983        | 1622.1986       | 0.2              | LVSCNTSVITQACPK  | [Hex]5[HexNAc]3[Fuc]1          |
|            | 2+           | 1650.7167        | 1650.7093       | 4                | LVSCNTSVITQACPK  | [Hex]5[HexNAc]4                |
|            | 2+           | 1723.7345        | 1723.7383       | 2                | LVSCNTSVITQACPK  | [Hex]5[HexNAc]4[Fuc]1          |
|            | 2+           | 1869.2821        | 1869.2860       | 2                | LVSCNTSVITQACPK  | [Hex]5[HexNAc]4[Fuc]1[NeuNAc]1 |
|            | 2+           | 1825.2763        | 1825.2780       | 1                | LVSCNTSVITQACPK  | [Hex]5[HexNAc]5[Fuc]1          |
|            | 2+           | 1926.8203        | 1926.8176       | 1                | LVSCNTSVITQACPK  | [Hex]5[HexNAc]6[Fuc]1          |
|            | 2+           | 1528.5906        | 1528.6564       | 43               | LVSCNTSVITQACPK  | [Hex]6[HexNAc]2                |
|            | 2+           | 1630.1777        | 1630.1960       | 11               | LVSCNTSVITQACPK  | [Hex]6[HexNAc]3                |
|            | 2+           | 1703.2417        | 1703.2250       | 10               | LVSCNTSVITQACPK  | [Hex]6[HexNAc]3[Fuc]1          |

| Env Domain | Charge State | Experimental m/z | Theoretical m/z | Mass Error (ppm) | Peptide Sequence                           | Glycan Composition             |
|------------|--------------|------------------|-----------------|------------------|--------------------------------------------|--------------------------------|
|            | 2+           | 1775.7547        | 1775.7437       | 6                | LVSCNTSVITQACPK                            | [Hex]6[HexNAc]3[NeuNAc]1       |
|            | 2+           | 1731.7342        | 1731.7357       | 1                | LVSCNTSVITQACPK                            | [Hex]6[HexNAc]4                |
|            | 2+           | 1833.2764        | 1833.2754       | 1                | LVSCNTSVITQACPK                            | [Hex]6[HexNAc]5                |
|            | 2+           | 1804.7856        | 1804.7433       | 23               | LVSCNTSVITQACPK                            | [Hex]6[HexNAc]4[Fuc]1          |
|            | 2+           | 1906.2980        | 1906.3044       | 3                | LVSCNTSVITQACPK                            | [Hex]6[HexNAc]5[Fuc]1          |
|            | 2+           | 1609.6587        | 1609.6828       | 15               | LVSCNTSVITQACPK                            | [Hex]7[HexNAc]2                |
|            | 2+           | 1690.7528        | 1690.7092       | 26               | LVSCNTSVITQACPK                            | [Hex]8[HexNAc]2                |
|            |              |                  |                 |                  |                                            |                                |
|            | 3+           | 1124.8032        | 1124.8157       | 11               | LVSCNTSVITQACPK                            | [Hex]4[HexNAc]3[Fuc]1[NeuNAc]1 |
|            | 3+           | 1141.1479        | 1141.1507       | 2                | LVSCNTSVITQACPK                            | [Hex]7[HexNAc]3                |
|            | 3+           | 1181.5006        | 1181.4928       | 7                | LVSCNTSVITQACPK                            | [Hex]9[HexNAc]2                |
|            | 3+           | 1230.8944        | 1230.8632       | 25               | LVSCNTSVITQACPK                            | [Hex]4[HexNAc]6[Fuc]1          |
|            | 3+           | 1251.8698        | 1251.8580       | 9                | LVSCNTSVITQACPK                            | [Hex]6[HexNAc]4[NeuNAc]1       |
|            | 3+           | 1257.5495        | 1257.5298       | 16               | LVSCNTSVITQACPK                            | [Hex]7[HexNAc]4[Fuc]1          |
|            | 3+           | 1290.2087        | 1290.2125       | 3                | LVSCNTSVITQACPK                            | [Hex]6[HexNAc]6                |
|            | 3+           | 1338.9246        | 1338.8985       | 19               | LVSCNTSVITQACPK                            | [Hex]6[HexNAc]6[Fuc]1          |
|            | 3+           | 1344.2468        | 1344.2301       | 12               | LVSCNTSVITQACPK                            | [Hex]7[HexNAc]6                |
|            | 3+           | 1357.2219        | 1357.2337       | 9                | LVSCNTSVITQACPK                            | [Hex]4[HexNAc]5[Fuc]1[NeuNAc]2 |
|            | 3+           | 1368.2507        | 1368.2371       | 10               | LVSCNTSVITQACPK                            | [Hex]6[HexNAc]5[Fuc]1[NeuNAc]1 |
|            | 3+           | 1392.9166        | 1392.9161       | 0.4              | LVSCNTSVITQACPK                            | [Hex]7[HexNAc]6[Fuc]1          |
|            | 3+           | 1433.2816        | 1433.2581       | 16               | LVSCNTSVITQACPK                            | [Hex]9[HexNAc]5[Fuc]1          |
|            | 3+           | 1435.9159        | 1435.9303       | 10               | LVSCNTSVITQACPK                            | [Hex]6[HexNAc]6[Fuc]1[NeuNAc]1 |
|            | 3+           | 1460.6318        | 1460.6092       | 15               | LVSCNTSVITQACPK                            | [Hex]7[HexNAc]7[Fuc]1          |
|            | 3+           | 1465.2800        | 1465.2689       | 8                | LVSCNTSVITQACPK                            | [Hex]6[HexNAc]5[Fuc]1[NeuNAc]2 |
|            | 3+           | 1489.9542        | 1489.9479       | 4                | LVSCNTSVITQACPK                            | [Hex]7[HexNAc]6[Fuc]1[NeuNAc]1 |
|            | 3+           | 1557.6791        | 1557.6409       | 25               | LVSCNTSVITQACPK                            | [Hex]7[HexNAc]7[Fuc]1[NeuNAc]1 |
|            |              |                  |                 |                  |                                            |                                |
| C2         | 4+           | 1713.5051        | 1713.5436       | 22               | QFIGTGPCTNVSTVQCTHGI RPVVSTQLLLNGSLAEEEVIR | [Hex]9[HexNAc]4                |
|            | 4+           | 1754.0385        | 1754.0568       | 10               | QFIGTGPCTNVSTVQCTHGI RPVVSTQLLLNGSLAEEEVIR | [Hex]10[HexNAc]4               |
|            | 4+           | 1794.5985        | 1794.6949       | 54               | QFIGTGPCTNVSTVQCTHGI RPVVSTQLLLNGSLAEEEVIR | [Hex]11[HexNAc]4               |
|            | 4+           | 1835.1038        | 1835.0832       | 11               | QFIGTGPCTNVSTVQCTHGI RPVVSTQLLLNGSLAEEEVIR | [Hex]12[HexNAc]4               |
|            | 4+           | 1875.6426        | 1875.5964       | 25               | QFIGTGPCTNVSTVQCTHGI RPVVSTQLLLNGSLAEEEVIR | [Hex]13[HexNAc]4               |
|            | 4+           | 1916.1612        | 1916.1097       | 27               | QFIGTGPCTNVSTVQCTHGI RPVVSTQLLLNGSLAEEEVIR | [Hex]14[HexNAc]4               |
|            | 4+           | 1956.6842        | 1956.6229       | 31               | QFIGTGPCTNVSTVQCTHGI RPVVSTQLLLNGSLAEEEVIR | [Hex]15[HexNAc]4               |
|            | 4+           | 1997.1502        | 1997.1361       | 7                | QFIGTGPCTNVSTVQCTHGI RPVVSTQLLLNGSLAEEEVIR | [Hex]16[HexNAc]4               |
|            |              |                  |                 |                  |                                            |                                |
|            | 1+           | 981.4694         | 981.4636        | 6                | SVNFSDNAK                                  | non-glycosylated               |
|            | 1+           | 1184.5654        | 1184.5429       | 19               | SVNFSDNAK                                  | [HexNAc]                       |
|            | 1+           | 1330.6192        | 1330.6009       | 14               | SVNFSDNAK                                  | [HexNAc][Fuc]                  |
|            |              |                  |                 |                  |                                            |                                |
|            | 2+           | 1315.0492        | 1315.0421       | 5                | SVNFSDNAK                                  | [Hex]3[HexNAc]5[Fuc]1          |
|            | 2+           | 1294.5187        | 1294.5288       | 8                | SVNFSDNAK                                  | [Hex]4[HexNAc]4[Fuc]1          |
|            | 2+           | 1541.6515        | 1541.6162       | 23               | SVNFSDNAK                                  | [Hex]4[HexNAc]5[Fuc]1[NeuNAc]1 |
|            | 2+           | 1099.4360        | 1099.4469       | 10               | SVNFSDNAK                                  | [Hex]5[HexNAc]2                |
|            | 2+           | 1375.5602        | 1375.5552       | 4                | SVNFSDNAK                                  | [Hex]5[HexNAc]4[Fuc]1          |
|            | 2+           | 1521.1178        | 1521.1029       | 10               | SVNFSDNAK                                  | [Hex]5[HexNAc]4[Fuc]1[NeuNAc]1 |
|            | 2+           | 1477.1073        | 1477.0949       | 8                | SVNFSDNAK                                  | [Hex]5[HexNAc]5[Fuc]1          |
|            | 2+           | 1768.1701        | 1768.1903       | 11               | SVNFSDNAK                                  | [Hex]5[HexNAc]5[Fuc]1[NeuNAc]2 |
|            | 2+           | 1578.6355        | 1578.6346       | 1                | SVNFSDNAK                                  | [Hex]5[HexNAc]6[Fuc]1          |
|            | 2+           | 1282.0278        | 1282.0130       | 12               | SVNFSDNAK                                  | [Hex]6[HexNAc]3                |

| Env Domain | Charge State | Experimental m/z | Theoretical m/z | Mass Error (ppm) | Peptide Sequence | Glycan Composition               |
|------------|--------------|------------------|-----------------|------------------|------------------|----------------------------------|
|            | 2+           | 1485.1012        | 1485.0924       | 6                | SVNFSDNAK        | [Hex]6[HexNAc]5                  |
|            | 2+           | 1558.1255        | 1558.1213       | 3                | SVNFSDNAK        | [Hex]6[HexNAc]5[Fuc]1            |
|            | 2+           | 1703.6826        | 1703.6690       | 8                | SVNFSDNAK        | [Hex]6[HexNAc]5[Fuc]1[NeuNAc]1   |
|            | 2+           | 1630.6614        | 1630.6401       | 13               | SVNFSDNAK        | [Hex]6[HexNAc]5[NeuNAc]1         |
|            | 2+           | 1586.6485        | 1586.6320       | 10               | SVNFSDNAK        | [Hex]6[HexNAc]6                  |
|            | 2+           | 1659.7023        | 1659.6610       | 25               | SVNFSDNAK        | [Hex]6[HexNAc]6[Fuc]1            |
|            | 2+           | 1711.6099        | 1711.6665       | 33               | SVNFSDNAK        | [Hex]7[HexNAc]5[NeuNAc]1         |
|            | 2+           | 1667.6726        | 1667.6585       | 8                | SVNFSDNAK        | [Hex]7[HexNAc]6                  |
|            | 2+           | 1886.2320        | 1886.2351       | 2                | SVNFSDNAK        | [Hex]7[HexNAc]6 [Fuc]1 [NeuNAc]1 |
|            | 2+           | 1740.6884        | 1740.6874       | 1                | SVNFSDNAK        | [Hex]7[HexNAc]6[Fuc]1            |
|            | 2+           | 1842.1862        | 1842.2271       | 22               | SVNFSDNAK        | [Hex]7[HexNAc]7[Fuc]1            |
|            |              |                  |                 |                  |                  |                                  |
|            | 3+           | 1047.0817        | 1047.0871       | 5                | SVNFSDNAK        | [Hex]4[HexNAc]6[NeuNAc]1         |
|            | 3+           | 1160.8025        | 1160.7940       | 7                | SVNFSDNAK        | [Hex]7[HexNAc]6[Fuc]1            |
|            | 3+           | 1325.5440        | 1325.5189       | 19               | SVNFSDNAK        | [Hex]7[HexNAc]7[Fuc]1[NeuNAc]1   |
|            |              |                  |                 |                  |                  |                                  |
|            | 1+           | 928.5803         | 928.5826        | 2                | TIIVQLNK         | non-glycosylated                 |
|            | 1+           | 1131.6882        | 1131.6619       | 23               | TIIVQLNK         | [HexNAc]                         |
|            |              |                  |                 |                  |                  |                                  |
|            | 2+           | 910.9532         | 910.9535        | 0.3              | TIIVQLNK         | [Hex]3[HexNAc]2                  |
|            | 2+           | 991.9765         | 991.9800        | 4                | TIIVQLNK         | [Hex]4[HexNAc]2                  |
|            | 2+           | 1073.0021        | 1073.0063       | 4                | TIIVQLNK         | [Hex]5[HexNAc]2                  |
|            | 2+           | 1154.0349        | 1154.0328       | 2                | TIIVQLNK         | [Hex]6[HexNAc]2                  |
|            | 2+           | 1255.5754        | 1255.5724       | 2                | TIIVQLNK         | [Hex]6[HexNAc]3                  |
|            | 2+           | 1235.0600        | 1235.0592       | 1                | TIIVQLNK         | [Hex]7[HexNAc]2                  |
|            | 2+           | 1336.5921        | 1336.5988       | 5                | TIIVQLNK         | [Hex]7[HexNAc]3                  |
|            | 2+           | 1316.0823        | 1316.0856       | 3                | TIIVQLNK         | [Hex]8[HexNAc]2                  |
|            | 2+           | 1397.1173        | 1397.1120       | 4                | TIIVQLNK         | [Hex]9[HexNAc]2                  |
|            |              |                  |                 |                  |                  |                                  |
| V2-V3      | 2+           | 831.3992         | 831.4048        | 7                | SVEITCTRPNNTR    | non-glycosylated                 |
|            | 2+           | 932.9480         | 932.9418        | 7                | SVEITCTRPNNTR    | [HexNAc]                         |
|            | 2+           | 1005.9797        | 1005.9734       | 6                | SVEITCTRPNNTR    | [HexNAc][Fuc]                    |
|            | 2+           | 1269.5711        | 1269.5660       | 4                | SVEITCTRPNNTR    | [Hex]2[HexNAc]2[Fuc]1            |
|            | 2+           | 1371.1351        | 1371.1056       | 22               | SVEITCTRPNNTR    | [Hex]2[HexNAc]3[Fuc]1            |
|            | 2+           | 1472.6701        | 1472.6454       | 17               | SVEITCTRPNNTR    | [Hex]2[HexNAc]4[Fuc]1            |
|            | 2+           | 1350.5991        | 1350.5924       | 5                | SVEITCTRPNNTR    | [Hex]3[HexNAc]2[Fuc]1            |
|            | 2+           | 1379.1175        | 1379.1031       | 10               | SVEITCTRPNNTR    | [Hex]3[HexNAc]3                  |
|            | 2+           | 1452.1323        | 1452.1321       | 0.1              | SVEITCTRPNNTR    | [Hex]3[HexNAc]3[Fuc]1            |
|            | 2+           | 1480.6180        | 1480.6428       | 17               | SVEITCTRPNNTR    | [Hex]3[HexNAc]4                  |
|            | 2+           | 1553.6726        | 1553.6717       | 1                | SVEITCTRPNNTR    | [Hex]3[HexNAc]4[Fuc]1            |
|            | 2+           | 1756.7399        | 1756.7512       | 6                | SVEITCTRPNNTR    | [Hex]3[HexNAc]6[Fuc]1            |
|            | 2+           | 1886.7723        | 1886.8016       | 16               | SVEITCTRPNNTR    | [Hex]3[HexNAc]8                  |
|            | 2+           | 1358.6310        | 1358.5899       | 30               | SVEITCTRPNNTR    | [Hex]4[HexNAc]2                  |
|            | 2+           | 1431.6283        | 1431.6188       | 7                | SVEITCTRPNNTR    | [Hex]4[HexNAc]2[Fuc]1            |
|            | 2+           | 1460.1563        | 1460.1295       | 18               | SVEITCTRPNNTR    | [Hex]4[HexNAc]3                  |
|            | 2+           | 1533.1601        | 1533.1585       | 1                | SVEITCTRPNNTR    | [Hex]4[HexNAc]3[Fuc]1            |
|            | 2+           | 1561.6723        | 1561.6692       | 2                | SVEITCTRPNNTR    | [Hex]4[HexNAc]4                  |
|            | 2+           | 1634.6978        | 1634.6982       | 0.2              | SVEITCTRPNNTR    | [Hex]4[HexNAc]4 [Fuc]1           |
|            | 2+           | 1707.7231        | 1707.7271       | 2                | SVEITCTRPNNTR    | [Hex]4[HexNAc]4[Fuc]2            |
|            | 2+           | 1736.2437        | 1736.2378       | 3                | SVEITCTRPNNTR    | [Hex]4[HexNAc]5[Fuc]1            |
|            | 2+           | 1881.8042        | 1881.7856       | 10               | SVEITCTRPNNTR    | [Hex]4[HexNAc]5[Fuc]1[NeuNAc]1   |

| Env Domain | Charge State | Experimental m/z | Theoretical m/z | Mass Error (ppm) | Peptide Sequence | Glycan Composition             |
|------------|--------------|------------------|-----------------|------------------|------------------|--------------------------------|
|            | 2+           | 1788.7707        | 1788.7535       | 10               | SVEICTRPNNNTR    | [Hex]5[HexNAc]4[Fuc]2          |
|            | 2+           | 1809.2620        | 1809.2668       | 3                | SVEICTRPNNNTR    | [Hex]4[HexNAc]5[Fuc]2          |
|            | 2+           | 1439.6237        | 1439.6162       | 5                | SVEICTRPNNNTR    | [Hex]5[HexNAc]2                |
|            | 2+           | 1541.1368        | 1541.1559       | 12               | SVEICTRPNNNTR    | [Hex]5[HexNAc]3                |
|            | 2+           | 1614.1872        | 1614.1849       | 1                | SVEICTRPNNNTR    | [Hex]5[HexNAc]3[Fuc]1          |
|            | 2+           | 1759.7467        | 1759.7326       | 8                | SVEICTRPNNNTR    | [Hex]5[HexNAc]3[Fuc]1[NeuNAc]1 |
|            | 2+           | 1715.7251        | 1715.7246       | 0.3              | SVEICTRPNNNTR    | [Hex]5[HexNAc]4[Fuc]1          |
|            | 2+           | 1861.2818        | 1861.2723       | 5                | SVEICTRPNNNTR    | [Hex]5[HexNAc]4[Fuc]1[NeuNAc]1 |
|            | 2+           | 1744.2405        | 1744.2353       | 3                | SVEICTRPNNNTR    | [Hex]5[HexNAc]5                |
|            | 2+           | 1817.2675        | 1817.2643       | 2                | SVEICTRPNNNTR    | [Hex]5[HexNAc]5[Fuc]1          |
|            | 2+           | 1962.8579        | 1962.8120       | 23               | SVEICTRPNNNTR    | [Hex]5[HexNAc]5[Fuc]1[NeuNAc]1 |
|            | 2+           | 1890.2782        | 1890.2932       | 8                | SVEICTRPNNNTR    | [Hex]5[HexNAc]5[Fuc]2          |
|            | 2+           | 1845.7572        | 1845.7750       | 10               | SVEICTRPNNNTR    | [Hex]5[HexNAc]6                |
|            | 2+           | 1520.6199        | 1520.6427       | 15               | SVEICTRPNNNTR    | [Hex]6[HexNAc]2                |
|            | 2+           | 1622.1719        | 1622.1823       | 6                | SVEICTRPNNNTR    | [Hex]6[HexNAc]3                |
|            | 2+           | 1767.7222        | 1767.7300       | 4                | SVEICTRPNNNTR    | [Hex]6[HexNAc]3[NeuNAc]1       |
|            |              |                  |                 |                  |                  |                                |
|            | 3+           | 1220.1742        | 1220.1892       | 12               | SVEICTRPNNNTR    | [Hex]3[HexNAc]6[Fuc]2          |
|            | 3+           | 1090.1388        | 1090.1345       | 4                | SVEICTRPNNNTR    | [Hex]4[HexNAc]4 [Fuc]1         |
|            | 3+           | 1351.8843        | 1351.8913       | 5                | SVEICTRPNNNTR    | [Hex]4[HexNAc]5[Fuc]1[NeuNAc]2 |
|            | 3+           | 1303.2166        | 1303.2053       | 9                | SVEICTRPNNNTR    | [Hex]4[HexNAc]5[NeuNAc]2       |
|            | 3+           | 1322.5757        | 1322.5526       | 17               | SVEICTRPNNNTR    | [Hex]4[HexNAc]6[Fuc]1[NeuNAc]1 |
|            | 3+           | 1273.8551        | 1273.8666       | 9                | SVEICTRPNNNTR    | [Hex]4[HexNAc]6[NeuNAc]1       |
|            | 3+           | 1338.2239        | 1338.2157       | 6                | SVEICTRPNNNTR    | [Hex]5[HexNAc]4[Fuc]1[NeuNAc]2 |
|            | 3+           | 1192.4679        | 1192.4679       | 0                | SVEICTRPNNNTR    | [Hex]5[HexNAc]4[NeuNAc]1       |
|            | 3+           | 1289.5576        | 1289.5298       | 22               | SVEICTRPNNNTR    | [Hex]5[HexNAc]4[NeuNAc]2       |
|            | 3+           | 1435.2920        | 1435.2475       | 31               | SVEICTRPNNNTR    | [Hex]5[HexNAc]4[Fuc]1[NeuNAc]3 |
|            | 3+           | 1405.8585        | 1405.9089       | 36               | SVEICTRPNNNTR    | [Hex]5[HexNAc]5[Fuc]1[NeuNAc]2 |
|            | 3+           | 1279.5485        | 1279.5384       | 8                | SVEICTRPNNNTR    | [Hex]5[HexNAc]6[Fuc]1          |
|            | 3+           | 1198.1634        | 1198.1697       | 5                | SVEICTRPNNNTR    | [Hex]6[HexNAc]4[Fuc]1          |
|            | 3+           | 1217.1730        | 1217.1769       | 3                | SVEICTRPNNNTR    | [Hex]6[HexNAc]5                |
|            | 3+           | 1265.8718        | 1265.8629       | 7                | SVEICTRPNNNTR    | [Hex]6[HexNAc]5[Fuc]1          |
|            | 3+           | 1362.8942        | 1362.8947       | 0.4              | SVEICTRPNNNTR    | [Hex]6[HexNAc]5[Fuc]1[NeuNAc]1 |
|            | 3+           | 1459.9346        | 1459.9265       | 6                | SVEICTRPNNNTR    | [Hex]6[HexNAc]5[Fuc]1[NeuNAc]2 |
|            | 3+           | 1333.5649        | 1333.5560       | 7                | SVEICTRPNNNTR    | [Hex]6[HexNAc]6[Fuc]1          |
|            | 3+           | 1430.5787        | 1430.5878       | 6                | SVEICTRPNNNTR    | [Hex]6[HexNAc]6[Fuc]1[NeuNAc]1 |
|            | 3+           | 1252.2006        | 1252.1873       | 11               | SVEICTRPNNNTR    | [Hex]7[HexNAc]4[Fuc]1          |
|            | 3+           | 1397.5659        | 1397.5650       | 1                | SVEICTRPNNNTR    | [Hex]7[HexNAc]4[NeuNAc]2       |
|            | 3+           | 1387.5502        | 1387.5736       | 17               | SVEICTRPNNNTR    | [Hex]7[HexNAc]6[Fuc]1          |
|            | 3+           | 1533.2693        | 1533.2914       | 14               | SVEICTRPNNNTR    | [Hex]7[HexNAc]6[Fuc]2[NeuNAc]1 |
|            | 3+           | 1630.3367        | 1630.3232       | 8                | SVEICTRPNNNTR    | [Hex]7[HexNAc]6[Fuc]2[NeuNAc]2 |
|            | 3+           | 1257.5231        | 1257.5190       | 3                | SVEICTRPNNNTR    | [Hex]8[HexNAc]4                |
|            | 3+           | 1379.2332        | 1379.2297       | 3                | SVEICTRPNNNTR    | [Hex]9[HexNAc]5                |
|            |              |                  |                 |                  |                  |                                |
|            | 3+           | 1381.5426        | 1381.5860       | 31               | SVEICTRPNNNTRK   | [Hex]7[HexNAc]6                |
|            |              |                  |                 |                  |                  |                                |
| V3-C3      | 2+           | 904.9222         | 904.9172        | 6                | AYCEINGTEWHSTLK  | non-glycosylated               |
|            | 2+           | 1006.4653        | 1006.4542       | 11               | AYCEINGTEWHSTLK  | [HexNAc]                       |
|            | 2+           | 1079.4730        | 1079.4858       | 12               | AYCEINGTEWHSTLK  | [HexNAc][Fuc]                  |
|            | 2+           | 1108.0085        | 1107.9966       | 11               | AYCEINGTEWHSTLK  | [HexNAc]2                      |
|            | 2+           | 1270.0507        | 1270.0494       | 1                | AYCEINGTEWHSTLK  | [Hex]2[HexNAc]2                |

| Env Domain | Charge State | Experimental m/z | Theoretical m/z | Mass Error (ppm) | Peptide Sequence | Glycan Composition             |
|------------|--------------|------------------|-----------------|------------------|------------------|--------------------------------|
|            | 2+           | 1351.0736        | 1351.0758       | 2                | AYCEINGTEWHSTLK  | [Hex]3[HexNAc]2                |
|            | 2+           | 1452.6273        | 1452.6155       | 8                | AYCEINGTEWHSTLK  | [Hex]3[HexNAc]3                |
|            | 2+           | 1525.6450        | 1525.6445       | 0.3              | AYCEINGTEWHSTLK  | [Hex]3[HexNAc]3[Fuc]1          |
|            | 2+           | 1554.1567        | 1554.1552       | 1                | AYCEINGTEWHSTLK  | [Hex]3[HexNAc]4                |
|            | 2+           | 1432.1021        | 1432.1023       | 0.1              | AYCEINGTEWHSTLK  | [Hex]4[HexNAc]2                |
|            | 2+           | 1533.6422        | 1533.6419       | 0.2              | AYCEINGTEWHSTLK  | [Hex]4[HexNAc]3                |
|            | 2+           | 1679.1915        | 1679.1896       | 1                | AYCEINGTEWHSTLK  | [Hex]4[HexNAc]3[NeuNAc]1       |
|            | 2+           | 1635.1735        | 1635.1816       | 5                | AYCEINGTEWHSTLK  | [Hex]4[HexNAc]4                |
|            | 2+           | 1708.2139        | 1708.2106       | 2                | AYCEINGTEWHSTLK  | [Hex]4[HexNAc]4 [Fuc]1         |
|            | 2+           | 1780.7205        | 1780.7293       | 5                | AYCEINGTEWHSTLK  | [Hex]4[HexNAc]4[NeuNAc]1       |
|            | 2+           | 1736.7067        | 1736.7213       | 8                | AYCEINGTEWHSTLK  | [Hex]4[HexNAc]5                |
|            | 2+           | 1809.7819        | 1809.7502       | 18               | AYCEINGTEWHSTLK  | [Hex]4[HexNAc]5[Fuc]1          |
|            | 2+           | 1955.3330        | 1955.2980       | 18               | AYCEINGTEWHSTLK  | [Hex]4[HexNAc]5[Fuc]1[NeuNAc]1 |
|            | 2+           | 1760.2133        | 1760.2160       | 2                | AYCEINGTEWHSTLK  | [Hex]5 [HexNAc]3 [NeuNAc]1     |
|            | 2+           | 1861.7545        | 1861.7557       | 1                | AYCEINGTEWHSTLK  | [Hex]5 [HexNAc]4 [NeuNAc]1     |
|            | 2+           | 1513.1320        | 1513.1286       | 2                | AYCEINGTEWHSTLK  | [Hex]5[HexNAc]2                |
|            | 2+           | 1614.6652        | 1614.6683       | 2                | AYCEINGTEWHSTLK  | [Hex]5[HexNAc]3                |
|            | 2+           | 1833.2472        | 1833.2450       | 1                | AYCEINGTEWHSTLK  | [Hex]5[HexNAc]3[Fuc]1[NeuNAc]1 |
|            | 2+           | 1905.7863        | 1905.7638       | 12               | AYCEINGTEWHSTLK  | [Hex]5[HexNAc]3[NeuNAc]2       |
|            | 2+           | 1716.2013        | 1716.2080       | 4                | AYCEINGTEWHSTLK  | [Hex]5[HexNAc]4                |
|            | 2+           | 1789.2387        | 1789.2370       | 1                | AYCEINGTEWHSTLK  | [Hex]5[HexNAc]4[Fuc]1          |
|            | 2+           | 1934.8136        | 1934.7847       | 15               | AYCEINGTEWHSTLK  | [Hex]5[HexNAc]4[Fuc]1[NeuNAc]1 |
|            | 2+           | 1817.7475        | 1817.7477       | 0.1              | AYCEINGTEWHSTLK  | [Hex]5[HexNAc]5                |
|            | 2+           | 1594.1529        | 1594.1551       | 1                | AYCEINGTEWHSTLK  | [Hex]6[HexNAc]2                |
|            | 2+           | 1695.6954        | 1695.6947       | 0.4              | AYCEINGTEWHSTLK  | [Hex]6[HexNAc]3                |
|            | 2+           | 1768.7297        | 1768.7237       | 3                | AYCEINGTEWHSTLK  | [Hex]6[HexNAc]3[Fuc]1          |
|            | 2+           | 1841.2401        | 1841.2424       | 1                | AYCEINGTEWHSTLK  | [Hex]6[HexNAc]3[NeuNAc]1       |
|            | 2+           | 1797.2318        | 1797.2344       | 1                | AYCEINGTEWHSTLK  | [Hex]6[HexNAc]4                |
|            | 2+           | 1675.1825        | 1675.1815       | 1                | AYCEINGTEWHSTLK  | [Hex]7[HexNAc]2                |
|            | 2+           | 1776.7366        | 1776.7211       | 9                | AYCEINGTEWHSTLK  | [Hex]7[HexNAc]3                |
|            | 2+           | 1756.1740        | 1756.2079       | 19               | AYCEINGTEWHSTLK  | [Hex]8[HexNAc]2                |
|            |              |                  |                 |                  |                  |                                |
|            | 3+           | 1090.4673        | 1090.4568       | 10               | AYCEINGTEWHSTLK  | [Hex]4[HexNAc]4                |
|            | 3+           | 1352.2410        | 1352.2136       | 20               | AYCEINGTEWHSTLK  | [Hex]4[HexNAc]5[NeuNAc]2       |
|            | 3+           | 1371.5821        | 1371.5609       | 15               | AYCEINGTEWHSTLK  | [Hex]4[HexNAc]6[Fuc]1[NeuNAc]1 |
|            | 3+           | 1076.7818        | 1076.7813       | 0.5              | AYCEINGTEWHSTLK  | [Hex]5[HexNAc]3                |
|            | 3+           | 1125.4693        | 1125.4673       | 2                | AYCEINGTEWHSTLK  | [Hex]5[HexNAc]3[Fuc]1          |
|            | 3+           | 1144.4756        | 1144.4744       | 1                | AYCEINGTEWHSTLK  | [Hex]5[HexNAc]4                |
|            | 3+           | 1241.5169        | 1241.5062       | 9                | AYCEINGTEWHSTLK  | [Hex]5 [HexNAc]4 [NeuNAc]1     |
|            | 3+           | 1338.5573        | 1338.5381       | 14               | AYCEINGTEWHSTLK  | [Hex]5[HexNAc]4[NeuNAc]2       |
|            | 3+           | 1435.6128        | 1435.5698       | 30               | AYCEINGTEWHSTLK  | [Hex]5[HexNAc]4[NeuNAc]3       |
|            | 3+           | 1290.2032        | 1290.1922       | 9                | AYCEINGTEWHSTLK  | [Hex]5[HexNAc]4[Fuc]1[NeuNAc]1 |
|            | 3+           | 1212.2013        | 1212.1676       | 28               | AYCEINGTEWHSTLK  | [Hex]5[HexNAc]5                |
|            | 3+           | 1260.8647        | 1260.8535       | 9                | AYCEINGTEWHSTLK  | [Hex]5[HexNAc]5[Fuc]1          |
|            | 3+           | 1357.9344        | 1357.8853       | 36               | AYCEINGTEWHSTLK  | [Hex]5[HexNAc]5[Fuc]1[NeuNAc]1 |
|            | 3+           | 1454.8534        | 1454.9171       | 44               | AYCEINGTEWHSTLK  | [Hex]5[HexNAc]5[Fuc]1[NeuNAc]2 |
|            | 3+           | 1309.2041        | 1309.1994       | 4                | AYCEINGTEWHSTLK  | [Hex]5[HexNAc]5[NeuNAc]1       |
|            | 3+           | 1247.1849        | 1247.1637       | 17               | AYCEINGTEWHSTLK  | [Hex]6[HexNAc]4[Fuc]1          |
|            | 3+           | 1266.1826        | 1266.1852       | 2                | AYCEINGTEWHSTLK  | [Hex]6[HexNAc]5                |
|            | 3+           | 1314.8524        | 1314.8711       | 14               | AYCEINGTEWHSTLK  | [Hex]6[HexNAc]5[Fuc]1          |
|            | 3+           | 1363.2228        | 1363.2170       | 4                | AYCEINGTEWHSTLK  | [Hex]6[HexNAc]5[NeuNAc]1       |

| Env Domain | Charge State | Experimental m/z | Theoretical m/z | Mass Error (ppm) | Peptide Sequence | Glycan Composition             |
|------------|--------------|------------------|-----------------|------------------|------------------|--------------------------------|
|            | 3+           | 1479.5964        | 1479.5961       | 0.2              | AYCEINGTEWHSTLK  | [Hex]6[HexNAc]6[Fuc]1[NeuNAc]1 |
|            | 3+           | 1430.9211        | 1430.9101       | 8                | AYCEINGTEWHSTLK  | [Hex]6[HexNAc]6[NeuNAc]1       |
|            | 3+           | 1547.2944        | 1547.2892       | 3                | AYCEINGTEWHSTLK  | [Hex]6[HexNAc]7[Fuc]1[NeuNAc]1 |
|            | 3+           | 1117.1212        | 1117.1234       | 2                | AYCEINGTEWHSTLK  | [Hex]7[HexNAc]2                |
|            | 3+           | 1184.8475        | 1184.8165       | 26               | AYCEINGTEWHSTLK  | [Hex]7[HexNAc]3                |
|            | 3+           | 1252.5010        | 1252.5096       | 7                | AYCEINGTEWHSTLK  | [Hex]7[HexNAc]4                |
|            | 3+           | 1301.2045        | 1301.1956       | 7                | AYCEINGTEWHSTLK  | [Hex]7[HexNAc]4[Fuc]1          |
|            | 3+           | 1533.6393        | 1533.6137       | 17               | AYCEINGTEWHSTLK  | [Hex]7[HexNAc]6[Fuc]1[NeuNAc]1 |
|            | 3+           | 1601.2660        | 1601.3067       | 25               | AYCEINGTEWHSTLK  | [Hex]7[HexNAc]7[Fuc]1[NeuNAc]1 |
|            | 3+           | 1552.6730        | 1552.6208       | 34               | AYCEINGTEWHSTLK  | [Hex]7[HexNAc]7[NeuNAc]1       |
|            |              |                  |                 |                  |                  |                                |
|            | 3+           | 1297.9001        | 1297.8801       | 15               | KAYCEINGTEWHSTLK | [Hex]4[HexNAc]5[NeuNAc]1       |
|            |              |                  |                 |                  |                  |                                |
| C3         | 1+           | 884.4090         | 884.3942        | 17               | EQYNK            | [HexNAc]                       |
|            |              |                  |                 |                  |                  |                                |
|            | 2+           | 1318.5543        | 1318.5156       | 29               | EQYNK            | [Hex]4[HexNAc]5[NeuNAc]1       |
|            | 2+           | 1371.0366        | 1371.0312       | 4                | EQYNK            | [Hex]5[HexNAc]4[Fuc]1[NeuNAc]1 |
|            | 2+           | 1327.0421        | 1327.0232       | 14               | EQYNK            | [Hex]5[HexNAc]5[Fuc]1          |
|            | 2+           | 1408.0681        | 1408.0496       | 13               | EQYNK            | [Hex]6[HexNAc]5[Fuc]1          |
|            | 2+           | 1553.6202        | 1553.5973       | 15               | EQYNK            | [Hex]6[HexNAc]5[Fuc]1[NeuNAc]1 |
|            | 2+           | 1509.5586        | 1509.5893       | 20               | EQYNK            | [Hex]6[HexNAc]6[Fuc]1          |
|            | 2+           | 1590.6111        | 1590.6157       | 3                | EQYNK            | [Hex]7[HexNAc]6[Fuc]1          |
|            | 2+           | 1736.1970        | 1736.1634       | 19               | EQYNK            | [Hex]7[HexNAc]6[Fuc]1[NeuNAc]1 |
|            |              |                  |                 |                  |                  |                                |
|            | 2+           | 1096.5344        | 1096.4836       | 46               | LREQYNK          | [Hex]3[HexNAc]3[Fuc]1          |
|            | 2+           | 1198.0318        | 1198.0233       | 7                | LREQYNK          | [Hex]3[HexNAc]4[Fuc]1          |
|            | 2+           | 1177.5043        | 1177.5100       | 5                | LREQYNK          | [Hex]4[HexNAc]3[Fuc]1          |
|            | 2+           | 1279.0490        | 1279.0497       | 1                | LREQYNK          | [Hex]4[HexNAc]4 [Fuc]1         |
|            | 2+           | 1554.6392        | 1554.6479       | 6                | LREQYNK          | [Hex]4[HexNAc]6[NeuNAc]1       |
|            | 2+           | 1360.0766        | 1360.0761       | 0.4              | LREQYNK          | [Hex]5[HexNAc]4[Fuc]1          |
|            | 2+           | 1752.7450        | 1752.7112       | 19               | LREQYNK          | [Hex]5[HexNAc]5[Fuc]1[NeuNAc]2 |
|            | 2+           | 1469.6316        | 1469.6133       | 12               | LREQYNK          | [Hex]6[HexNAc]5                |
|            | 2+           | 1833.7368        | 1833.7376       | 0.4              | LREQYNK          | [Hex]6[HexNAc]5[Fuc]1[NeuNAc]2 |
|            | 2+           | 1615.1949        | 1615.1610       | 21               | LREQYNK          | [Hex]6[HexNAc]5[NeuNAc]1       |
|            | 2+           | 1789.6837        | 1789.7296       | 26               | LREQYNK          | [Hex]6[HexNAc]6[Fuc]1[NeuNAc]1 |
|            | 2+           | 1826.7809        | 1826.7480       | 18               | LREQYNK          | [Hex]7[HexNAc]7[Fuc]1          |
|            |              |                  |                 |                  |                  |                                |
|            | 3+           | 907.0515         | 907.0532        | 2                | LREQYNK          | [Hex]5[HexNAc]4[Fuc]1          |
|            | 3+           | 1168.7877        | 1168.8099       | 19               | LREQYNK          | [Hex]5[HexNAc]5[Fuc]1[NeuNAc]2 |
|            | 3+           | 1222.8331        | 1222.8275       | 5                | LREQYNK          | [Hex]6[HexNAc]5[Fuc]1[NeuNAc]2 |
|            | 3+           | 1387.5217        | 1387.5524       | 22               | LREQYNK          | [Hex]6[HexNAc]6[Fuc]1[NeuNAc]3 |
|            | 3+           | 1261.1987        | 1261.1819       | 13               | LREQYNK          | [Hex]6[HexNAc]7[Fuc]1[NeuNAc]1 |
|            | 3+           | 1150.4857        | 1150.4746       | 10               | LREQYNK          | [Hex]7[HexNAc]6[Fuc]1          |
|            | 3+           | 1247.5245        | 1247.5064       | 15               | LREQYNK          | [Hex]7[HexNAc]6[Fuc]1[NeuNAc]1 |
|            | 3+           | 1344.5406        | 1344.5382       | 2                | LREQYNK          | [Hex]7[HexNAc]6[Fuc]1[NeuNAc]2 |
|            | 3+           | 1441.5519        | 1441.5700       | 13               | LREQYNK          | [Hex]7[HexNAc]6[Fuc]1[NeuNAc]3 |
|            | 3+           | 1296.1853        | 1296.1924       | 5                | LREQYNK          | [Hex]7[HexNAc]6[Fuc]2[NeuNAc]1 |
|            | 3+           | 1315.2078        | 1315.1996       | 6                | LREQYNK          | [Hex]7[HexNAc]7[Fuc]1[NeuNAc]1 |
|            | 3+           | 1606.3604        | 1606.2950       | 41               | LREQYNK          | [Hex]7[HexNAc]7[Fuc]1[NeuNAc]4 |
|            | 3+           | 1369.2051        | 1369.2172       | 9                | LREQYNK          | [Hex]8[HexNAc]7[Fuc]1[NeuNAc]1 |
|            |              |                  |                 |                  |                  |                                |



| Env Domain | Charge State | Experimental m/z | Theoretical m/z | Mass Error (ppm) | Peptide Sequence           | Glycan Composition             |
|------------|--------------|------------------|-----------------|------------------|----------------------------|--------------------------------|
|            | 1+           | 749.4287         | 749.4304        | 2                | TIVFNR                     | non-glycosylated               |
|            | 1+           | 952.5214         | 952.5098        | 12               | TIVFNR                     | [HexNAc]                       |
|            |              |                  |                 |                  |                            |                                |
|            | 2+           | 821.3778         | 821.3775        | 0.4              | TIVFNR                     | [Hex]3[HexNAc]2                |
|            | 2+           | 902.4031         | 902.4039        | 1                | TIVFNR                     | [Hex]4[HexNAc]2                |
|            | 2+           | 983.4291         | 983.4303        | 1                | TIVFNR                     | [Hex]5[HexNAc]2                |
|            | 2+           | 1064.4565        | 1064.4567       | 0.2              | TIVFNR                     | [Hex]6 [HexNAc]2               |
|            | 2+           | 1084.9640        | 1084.9700       | 6                | TIVFNR                     | [Hex]5[HexNAc]3                |
|            | 2+           | 1165.9936        | 1165.9964       | 2                | TIVFNR                     | [Hex]6[HexNAc]3                |
|            | 2+           | 1311.5591        | 1311.5441       | 11               | TIVFNR                     | [Hex]6[HexNAc]3[NeuNAc]1       |
|            | 2+           | 1145.4829        | 1145.4831       | 0.2              | TIVFNR                     | [Hex]7[HexNAc]2                |
|            | 2+           | 1226.5116        | 1226.5095       | 2                | TIVFNR                     | [Hex]8[HexNAc]2                |
|            | 2+           | 1307.5725        | 1307.5359       | 28               | TIVFNR                     | [Hex]9[HexNAc]2                |
|            |              |                  |                 |                  |                            |                                |
| C3-V4      | 3+           | 1444.5280        | 1444.5672       | 27               | SSGGDPEIVMYSFNCGGEFFYCNSTK | [Hex]6[HexNAc]2                |
|            | 3+           | 1498.6268        | 1498.5848       | 28               | SSGGDPEIVMYSFNCGGEFFYCNSTK | [Hex]7[HexNAc]2                |
|            | 3+           | 1552.6055        | 1552.6024       | 2                | SSGGDPEIVMYSFNCGGEFFYCNSTK | [Hex]8[HexNAc]2                |
|            | 3+           | 1606.6243        | 1606.6200       | 3                | SSGGDPEIVMYSFNCGGEFFYCNSTK | [Hex]9[HexNAc]2                |
|            |              |                  |                 |                  |                            |                                |
| V4         | 2+           | 1282.0663        | 1282.0471       | 15               | LFNSTWPWNDTK               | [Hex]4[HexNAc]2                |
|            | 2+           | 1363.0696        | 1363.0735       | 3                | LFNSTWPWNDTK               | [Hex]5[HexNAc]2                |
|            | 2+           | 1444.0971        | 1444.0999       | 2                | LFNSTWPWNDTK               | [Hex]6[HexNAc]2                |
|            | 2+           | 1525.1272        | 1525.1263       | 1                | LFNSTWPWNDTK               | [Hex]7[HexNAc]2                |
|            | 2+           | 1606.1508        | 1606.1527       | 1                | LFNSTWPWNDTK               | [Hex]8[HexNAc]2                |
|            |              |                  |                 |                  |                            |                                |
| V4-C4      | 2+           | 756.8773         | 756.8803        | 4                | GSHDTNGTLILPCK             | non-glycosylated               |
|            | 2+           | 858.4219         | 858.4170        | 6                | GSHDTNGTLILPCK             | [HexNAc]                       |
|            | 2+           | 931.4557         | 931.4460        | 10               | GSHDTNGTLILPCK             | [HexNAc][Fuc]                  |
|            | 2+           | 1203.0349        | 1203.0360       | 1                | GSHDTNGTLILPCK             | [Hex]3[HexNAc]2                |
|            | 2+           | 1276.0532        | 1276.0649       | 9                | GSHDTNGTLILPCK             | [Hex]3[HexNAc]2[Fuc]1          |
|            | 2+           | 1304.5864        | 1304.5757       | 8                | GSHDTNGTLILPCK             | [Hex]3[HexNAc]3                |
|            | 2+           | 1377.6095        | 1377.6046       | 4                | GSHDTNGTLILPCK             | [Hex]3[HexNAc]3[Fuc]1          |
|            | 2+           | 1406.1141        | 1406.1153       | 1                | GSHDTNGTLILPCK             | [Hex]3[HexNAc]4                |
|            | 2+           | 1479.1352        | 1479.1443       | 6                | GSHDTNGTLILPCK             | [Hex]3[HexNAc]4[Fuc]1          |
|            | 2+           | 1507.6347        | 1507.6551       | 14               | GSHDTNGTLILPCK             | [Hex]3[HexNAc]5                |
|            | 2+           | 1580.6837        | 1580.6840       | 0.2              | GSHDTNGTLILPCK             | [Hex]3[HexNAc]5[Fuc]1          |
|            | 2+           | 1284.0707        | 1284.0624       | 6                | GSHDTNGTLILPCK             | [Hex]4[HexNAc]2                |
|            | 2+           | 1385.5919        | 1385.6021       | 7                | GSHDTNGTLILPCK             | [Hex]4[HexNAc]3                |
|            | 2+           | 1458.6236        | 1458.6310       | 5                | GSHDTNGTLILPCK             | [Hex]4[HexNAc]3[Fuc]1          |
|            | 2+           | 1604.1829        | 1604.1787       | 3                | GSHDTNGTLILPCK             | [Hex]4[HexNAc]3[Fuc]1[NeuNAc]1 |
|            | 2+           | 1487.1365        | 1487.1418       | 4                | GSHDTNGTLILPCK             | [Hex]4[HexNAc]4                |
|            | 2+           | 1560.1731        | 1560.1707       | 2                | GSHDTNGTLILPCK             | [Hex]4[HexNAc]4 [Fuc]1         |
|            | 2+           | 1705.7099        | 1705.7184       | 5                | GSHDTNGTLILPCK             | [Hex]4[HexNAc]4[Fuc]1[NeuNAc]1 |
|            | 2+           | 1632.6696        | 1632.6895       | 12               | GSHDTNGTLILPCK             | [Hex]4[HexNAc]4[NeuNAc]1       |
|            | 2+           | 1588.6894        | 1588.6815       | 5                | GSHDTNGTLILPCK             | [Hex]4[HexNAc]5                |
|            | 2+           | 1661.7139        | 1661.7103       | 2                | GSHDTNGTLILPCK             | [Hex]4[HexNAc]5[Fuc]1          |
|            | 2+           | 1807.2346        | 1807.2581       | 13               | GSHDTNGTLILPCK             | [Hex]4[HexNAc]5[Fuc]1[NeuNAc]1 |
|            | 2+           | 1734.2604        | 1734.2292       | 18               | GSHDTNGTLILPCK             | [Hex]4[HexNAc]5[NeuNAc]1       |
|            | 2+           | 1835.7676        | 1835.7689       | 1                | GSHDTNGTLILPCK             | [Hex]4[HexNAc]6[NeuNAc]1       |
|            | 2+           | 1365.0878        | 1365.0888       | 1                | GSHDTNGTLILPCK             | [Hex]5[HexNAc]2                |
|            | 2+           | 1466.6329        | 1466.6285       | 3                | GSHDTNGTLILPCK             | [Hex]5[HexNAc]3                |

| Env Domain | Charge State | Experimental m/z | Theoretical m/z | Mass Error (ppm) | Peptide Sequence | Glycan Composition             |
|------------|--------------|------------------|-----------------|------------------|------------------|--------------------------------|
|            | 2+           | 1612.1871        | 1612.1762       | 7                | GSHDTNGTLILPCK   | [Hex]5[HexNAc]3[NeuNAc]1       |
|            | 2+           | 1539.6558        | 1539.6574       | 1                | GSHDTNGTLILPCK   | [Hex]5[HexNAc]3[Fuc]1          |
|            | 2+           | 1685.1931        | 1685.2051       | 7                | GSHDTNGTLILPCK   | [Hex]5[HexNAc]3[Fuc]1[NeuNAc]1 |
|            | 2+           | 1757.6895        | 1757.7239       | 20               | GSHDTNGTLILPCK   | [Hex]5[HexNAc]3[NeuNAc]2       |
|            | 2+           | 1568.1674        | 1568.1682       | 1                | GSHDTNGTLILPCK   | [Hex]5[HexNAc]4                |
|            | 2+           | 1641.1888        | 1641.1971       | 5                | GSHDTNGTLILPCK   | [Hex]5[HexNAc]4[Fuc]1          |
|            | 2+           | 1786.7403        | 1786.7448       | 3                | GSHDTNGTLILPCK   | [Hex]5[HexNAc]4[Fuc]1[NeuNAc]1 |
|            | 2+           | 1932.3032        | 1932.3055       | 6                | GSHDTNGTLILPCK   | [Hex]5[HexNAc]4[Fuc]1[NeuNAc]2 |
|            | 2+           | 1713.7120        | 1713.7159       | 2                | GSHDTNGTLILPCK   | [Hex]5[HexNAc]4[NeuNAc]1       |
|            | 2+           | 1669.6997        | 1669.7079       | 5                | GSHDTNGTLILPCK   | [Hex]5[HexNAc]5                |
|            | 2+           | 1742.7342        | 1742.7368       | 1                | GSHDTNGTLILPCK   | [Hex]5[HexNAc]5[Fuc]1          |
|            | 2+           | 1888.2955        | 1888.2845       | 6                | GSHDTNGTLILPCK   | [Hex]5[HexNAc]5[Fuc]1[NeuNAc]1 |
|            | 2+           | 1815.7635        | 1815.7658       | 1                | GSHDTNGTLILPCK   | [Hex]5[HexNAc]5[Fuc]2          |
|            | 2+           | 1771.2470        | 1771.2476       | 0.3              | GSHDTNGTLILPCK   | [Hex]5[HexNAc]6                |
|            | 2+           | 1917.2904        | 1917.3055       | 8                | GSHDTNGTLILPCK   | [Hex]5[HexNAc]6[Fuc]2          |
|            | 2+           | 1446.0869        | 1446.1152       | 20               | GSHDTNGTLILPCK   | [Hex]6[HexNAc]2                |
|            | 2+           | 1547.6678        | 1547.6549       | 8                | GSHDTNGTLILPCK   | [Hex]6[HexNAc]3                |
|            | 2+           | 1620.6868        | 1620.6838       | 2                | GSHDTNGTLILPCK   | [Hex]6[HexNAc]3[Fuc]1          |
|            | 2+           | 1693.2214        | 1693.2026       | 11               | GSHDTNGTLILPCK   | [Hex]6[HexNAc]3[NeuNAc]1       |
|            | 2+           | 1649.2156        | 1649.1946       | 13               | GSHDTNGTLILPCK   | [Hex]6[HexNAc]4                |
|            | 2+           | 1722.2315        | 1722.2235       | 5                | GSHDTNGTLILPCK   | [Hex]6[HexNAc]4[Fuc]1          |
|            | 2+           | 1750.7284        | 1750.7343       | 3                | GSHDTNGTLILPCK   | [Hex]6[HexNAc]5                |
|            | 2+           | 1823.7645        | 1823.7632       | 1                | GSHDTNGTLILPCK   | [Hex]6[HexNAc]5[Fuc]1          |
|            | 2+           | 1969.2988        | 1969.3109       | 6                | GSHDTNGTLILPCK   | [Hex]6[HexNAc]5[Fuc]1[NeuNAc]1 |
|            | 2+           | 1925.3001        | 1925.3029       | 1                | GSHDTNGTLILPCK   | [Hex]6[HexNAc]6[Fuc]1          |
|            | 2+           | 1803.2822        | 1803.2499       | 18               | GSHDTNGTLILPCK   | [Hex]7[HexNAc]4[Fuc]1          |
|            |              |                  |                 |                  |                  |                                |
|            | 3+           | 1205.1817        | 1205.1745       | 6                | GSHDTNGTLILPCK   | [Hex]4[HexNAc]5[Fuc]1[NeuNAc]1 |
|            | 3+           | 1302.2212        | 1302.2063       | 11               | GSHDTNGTLILPCK   | [Hex]4[HexNAc]5[Fuc]1[NeuNAc]2 |
|            | 3+           | 1156.4959        | 1156.4885       | 6                | GSHDTNGTLILPCK   | [Hex]4[HexNAc]5[NeuNAc]1       |
|            | 3+           | 1175.8362        | 1175.8358       | 0.3              | GSHDTNGTLILPCK   | [Hex]4[HexNAc]6[Fuc]1          |
|            | 3+           | 1272.8931        | 1272.8676       | 20               | GSHDTNGTLILPCK   | [Hex]4[HexNAc]6[Fuc]1[NeuNAc]1 |
|            | 3+           | 1288.5404        | 1288.5308       | 7                | GSHDTNGTLILPCK   | [Hex]5[HexNAc]4[Fuc]1[NeuNAc]2 |
|            | 3+           | 1307.5422        | 1307.5640       | 3                | GSHDTNGTLILPCK   | [Hex]5[HexNAc]5[NeuNAc]2       |
|            | 3+           | 1356.2401        | 1356.2239       | 12               | GSHDTNGTLILPCK   | [Hex]5[HexNAc]5[Fuc]1[NeuNAc]2 |
|            | 3+           | 1210.4860        | 1210.5061       | 17               | GSHDTNGTLILPCK   | [Hex]5[HexNAc]5[NeuNAc]1       |
|            | 3+           | 1229.8606        | 1229.8534       | 6                | GSHDTNGTLILPCK   | [Hex]5[HexNAc]6[Fuc]1          |
|            | 3+           | 1375.2394        | 1375.2311       | 6                | GSHDTNGTLILPCK   | [Hex]5[HexNAc]6[NeuNAc]2       |
|            | 3+           | 1196.8218        | 1196.8306       | 7                | GSHDTNGTLILPCK   | [Hex]6[HexNAc]4[NeuNAc]1       |
|            | 3+           | 1313.2087        | 1313.2097       | 1                | GSHDTNGTLILPCK   | [Hex]6[HexNAc]5[Fuc]1[NeuNAc]1 |
|            | 3+           | 1410.2562        | 1410.2415       | 10               | GSHDTNGTLILPCK   | [Hex]6[HexNAc]5[Fuc]1[NeuNAc]2 |
|            | 3+           | 1361.8962        | 1361.8957       | 0.4              | GSHDTNGTLILPCK   | [Hex]6[HexNAc]5[Fuc]2[NeuNAc]1 |
|            | 3+           | 1264.5437        | 1264.5237       | 16               | GSHDTNGTLILPCK   | [Hex]6[HexNAc]5[NeuNAc]1       |
|            | 3+           | 1235.1653        | 1235.1850       | 16               | GSHDTNGTLILPCK   | [Hex]6[HexNAc]6                |
|            | 3+           | 1380.9072        | 1380.9028       | 3                | GSHDTNGTLILPCK   | [Hex]6[HexNAc]6[Fuc]1[NeuNAc]1 |
|            | 3+           | 1477.9320        | 1477.9346       | 2                | GSHDTNGTLILPCK   | [Hex]6[HexNAc]6[Fuc]1[NeuNAc]2 |
|            | 3+           | 1497.2804        | 1497.2819       | 1                | GSHDTNGTLILPCK   | [Hex]6[HexNAc]7[Fuc]2[NeuNAc]1 |
|            | 3+           | 1086.1683        | 1086.1233       | 41               | GSHDTNGTLILPCK   | [Hex]7[HexNAc]3                |
|            | 3+           | 1337.9047        | 1337.8886       | 12               | GSHDTNGTLILPCK   | [Hex]7[HexNAc]6[Fuc]1          |
|            | 3+           | 1434.9338        | 1434.9204       | 9                | GSHDTNGTLILPCK   | [Hex]7[HexNAc]6[Fuc]1[NeuNAc]1 |
|            | 3+           | 1531.9798        | 1531.9522       | 18               | GSHDTNGTLILPCK   | [Hex]7[HexNAc]6[Fuc]1[NeuNAc]2 |

| Env Domain | Charge State | Experimental m/z | Theoretical m/z | Mass Error (ppm) | Peptide Sequence      | Glycan Composition             |
|------------|--------------|------------------|-----------------|------------------|-----------------------|--------------------------------|
|            | 3+           | 1405.5778        | 1405.5817       | 3                | GSHDTNGTLILPCK        | [Hex]7[HexNAc]7[Fuc]1          |
|            | 3+           | 1502.6195        | 1502.6135       | 4                | GSHDTNGTLILPCK        | [Hex]7[HexNAc]7[Fuc]1[NeuNAc]1 |
|            | 3+           | 1424.5819        | 1424.5889       | 5                | GSHDTNGTLILPCK        | [Hex]7[HexNAc]8                |
|            | 3+           | 1126.4556        | 1126.4654       | 9                | GSHDTNGTLILPCK        | [Hex]9[HexNAc]2                |
|            |              |                  |                 |                  |                       |                                |
| C4         | 1+           | 1537.8217        | 1537.7890       | 21               | CSSNITGLLLTR          | [HexNAc]                       |
|            |              |                  |                 |                  |                       |                                |
|            | 2+           | 667.8621         | 667.8584        | 6                | CSSNITGLLLTR          | non-glycosylated               |
|            | 2+           | 1114.0193        | 1114.0171       | 2                | CSSNITGLLLTR          | [Hex]3[HexNAc]2                |
|            | 2+           | 1195.0481        | 1195.0435       | 4                | CSSNITGLLLTR          | [Hex]4[HexNAc]2                |
|            | 2+           | 1276.0742        | 1276.0699       | 3                | CSSNITGLLLTR          | [Hex]5[HexNAc]2                |
|            | 2+           | 1357.0935        | 1357.0963       | 2                | CSSNITGLLLTR          | [Hex]6[HexNAc]2                |
|            | 2+           | 1438.1242        | 1438.1227       | 1                | CSSNITGLLLTR          | [Hex]7[HexNAc]2                |
|            | 2+           | 1519.1513        | 1519.1491       | 1                | CSSNITGLLLTR          | [Hex]8[HexNAc]2                |
|            | 2+           | 1600.1829        | 1600.1755       | 5                | CSSNITGLLLTR          | [Hex]9[HexNAc]2                |
|            |              |                  |                 |                  |                       |                                |
| C4-V5      | 2+           | 1151.4785        | 1151.4875       | 8                | DGGYESNETDEIFRPGGGDMR | non-glycosylated               |
|            |              |                  |                 |                  |                       |                                |
|            | 2+           | 1699.1581        | 1699.1858       | 16               | DGGYESNETDEIFRPGGGDMR | [Hex]3[HexNAc]3                |
|            | 2+           | 1772.2165        | 1772.2147       | 1                | DGGYESNETDEIFRPGGGDMR | [Hex]3[HexNAc]3[Fuc]1          |
|            |              |                  |                 |                  |                       |                                |
|            | 2+           | 1853.2506        | 1853.2411       | 5                | DGGYESNETDEIFRPGGGDMR | [Hex]4[HexNAc]3[Fuc]1          |
|            | 2+           | 1962.7677        | 1962.7783       | 5                | DGGYESNETDEIFRPGGGDMR | [Hex]5[HexNAc]4                |
|            |              |                  |                 |                  |                       |                                |
|            | 3+           | 1181.7722        | 1181.8122       | 34               | DGGYESNETDEIFRPGGGDMR | [Hex]3[HexNAc]3[Fuc]1          |
|            | 3+           | 1249.5180        | 1249.5053       | 10               | DGGYESNETDEIFRPGGGDMR | [Hex]3[HexNAc]4[Fuc]1          |
|            | 3+           | 1317.1923        | 1317.1985       | 5                | DGGYESNETDEIFRPGGGDMR | [Hex]3[HexNAc]5[Fuc]1          |
|            | 3+           | 1384.8986        | 1384.8916       | 5                | DGGYESNETDEIFRPGGGDMR | [Hex]3[HexNAc]6[Fuc]1          |
|            | 3+           | 1303.5659        | 1303.5230       | 33               | DGGYESNETDEIFRPGGGDMR | [Hex]4[HexNAc]4 [Fuc]1         |
|            | 3+           | 1400.5404        | 1400.5548       | 10               | DGGYESNETDEIFRPGGGDMR | [Hex]4[HexNAc]4[Fuc]1[NeuNAc]1 |
|            | 3+           | 1371.2097        | 1371.2161       | 5                | DGGYESNETDEIFRPGGGDMR | [Hex]4[HexNAc]5[Fuc]1          |
|            | 3+           | 1565.2772        | 1565.2797       | 2                | DGGYESNETDEIFRPGGGDMR | [Hex]4[HexNAc]5[Fuc]1[NeuNAc]2 |
|            | 3+           | 1173.4693        | 1173.4683       | 1                | DGGYESNETDEIFRPGGGDMR | [Hex]5[HexNAc]2                |
|            | 3+           | 1241.1986        | 1241.1615       | 30               | DGGYESNETDEIFRPGGGDMR | [Hex]5[HexNAc]3                |
|            | 3+           | 1357.5471        | 1357.5406       | 5                | DGGYESNETDEIFRPGGGDMR | [Hex]5[HexNAc]4[Fuc]1          |
|            | 3+           | 1454.5802        | 1454.5724       | 5                | DGGYESNETDEIFRPGGGDMR | [Hex]5[HexNAc]4[Fuc]1[NeuNAc]1 |
|            | 3+           | 1551.5835        | 1551.6042       | 13               | DGGYESNETDEIFRPGGGDMR | [Hex]5[HexNAc]4[Fuc]1[NeuNAc]2 |
|            | 3+           | 1376.5611        | 1376.5477       | 10               | DGGYESNETDEIFRPGGGDMR | [Hex]5[HexNAc]5                |
|            | 3+           | 1425.2468        | 1425.2337       | 9                | DGGYESNETDEIFRPGGGDMR | [Hex]5[HexNAc]5[Fuc]1          |
|            | 3+           | 1522.2713        | 1522.2655       | 4                | DGGYESNETDEIFRPGGGDMR | [Hex]5[HexNAc]5[Fuc]1[NeuNAc]1 |
|            | 3+           | 1492.9230        | 1492.9268       | 3                | DGGYESNETDEIFRPGGGDMR | [Hex]5[HexNAc]6[Fuc]1          |
|            | 3+           | 1589.9937        | 1589.9586       | 22               | DGGYESNETDEIFRPGGGDMR | [Hex]5[HexNAc]6[Fuc]1[NeuNAc]1 |
|            | 3+           | 1227.5086        | 1227.4860       | 18               | DGGYESNETDEIFRPGGGDMR | [Hex]6[HexNAc]2                |
|            | 3+           | 1556.9889        | 1556.9358       | 34               | DGGYESNETDEIFRPGGGDMR | [Hex]6[HexNAc]4[NeuNAc]2       |
|            | 3+           | 1430.5986        | 1430.5653       | 30               | DGGYESNETDEIFRPGGGDMR | [Hex]6[HexNAc]5                |
|            | 3+           | 1479.2691        | 1479.2513       | 12               | DGGYESNETDEIFRPGGGDMR | [Hex]6[HexNAc]5[Fuc]1          |
|            | 3+           | 1576.2875        | 1576.2831       | 3                | DGGYESNETDEIFRPGGGDMR | [Hex]6[HexNAc]5[Fuc]1[NeuNAc]1 |
|            | 3+           | 1673.3124        | 1673.3149       | 1                | DGGYESNETDEIFRPGGGDMR | [Hex]6[HexNAc]5[Fuc]1[NeuNAc]2 |
|            | 3+           | 1770.3555        | 1770.3467       | 5                | DGGYESNETDEIFRPGGGDMR | [Hex]6[HexNAc]5[Fuc]1[NeuNAc]3 |
|            | 3+           | 1527.6033        | 1527.5971       | 4                | DGGYESNETDEIFRPGGGDMR | [Hex]6[HexNAc]5[NeuNAc]1       |
|            | 3+           | 1624.6544        | 1624.6289       | 16               | DGGYESNETDEIFRPGGGDMR | [Hex]6[HexNAc]5[NeuNAc]2       |

| Env Domain | Charge State | Experimental m/z | Theoretical m/z | Mass Error (ppm) | Peptide Sequence          | Glycan Composition             |
|------------|--------------|------------------|-----------------|------------------|---------------------------|--------------------------------|
|            | 3+           | 1498.3008        | 1498.2584       | 28               | DGGYESNETDEIFRPGGGDMR     | [Hex]6[HexNAc]6                |
|            | 3+           | 1546.9467        | 1546.9444       | 1                | DGGYESNETDEIFRPGGGDMR     | [Hex]6[HexNAc]6[Fuc]1          |
|            | 3+           | 1643.9782        | 1643.9762       | 1                | DGGYESNETDEIFRPGGGDMR     | [Hex]6[HexNAc]6[Fuc]1[NeuNAc]1 |
|            | 3+           | 1740.9297        | 1741.0080       | 45               | DGGYESNETDEIFRPGGGDMR     | [Hex]6[HexNAc]6[Fuc]1[NeuNAc]2 |
|            | 3+           | 1595.3426        | 1595.2903       | 33               | DGGYESNETDEIFRPGGGDMR     | [Hex]6[HexNAc]6[NeuNAc]1       |
|            | 3+           | 1614.6967        | 1614.6375       | 37               | DGGYESNETDEIFRPGGGDMR     | [Hex]6[HexNAc]7[Fuc]1          |
|            | 3+           | 1281.5412        | 1281.5036       | 29               | DGGYESNETDEIFRPGGGDMR     | [Hex]7[HexNAc]2                |
|            | 3+           | 1600.9737        | 1600.9620       | 7                | DGGYESNETDEIFRPGGGDMR     | [Hex]7[HexNAc]6[Fuc]1          |
|            | 3+           | 1697.9822        | 1697.9938       | 7                | DGGYESNETDEIFRPGGGDMR     | [Hex]7[HexNAc]6[Fuc]1[NeuNAc]1 |
|            | 3+           | 1795.0104        | 1795.0256       | 8                | DGGYESNETDEIFRPGGGDMR     | [Hex]7[HexNAc]6[Fuc]1[NeuNAc]2 |
|            | 3+           | 1668.6626        | 1668.6551       | 4                | DGGYESNETDEIFRPGGGDMR     | [Hex]7[HexNAc]7[Fuc]1          |
|            | 3+           | 1765.6729        | 1765.6869       | 8                | DGGYESNETDEIFRPGGGDMR     | [Hex]7[HexNAc]7[Fuc]1[NeuNAc]1 |
|            | 3+           | 1862.7033        | 1862.7187       | 8                | DGGYESNETDEIFRPGGGDMR     | [Hex]7[HexNAc]7[Fuc]1[NeuNAc]2 |
|            | 3+           | 1722.6417        | 1722.6728       | 18               | DGGYESNETDEIFRPGGGDMR     | [Hex]8 [HexNAc]7 [Fuc]1        |
|            |              |                  |                 |                  |                           |                                |
|            | 4+           | 1324.5127        | 1324.5170       | 3                | DGGYESNETDEIFRPGGGDMR     | [Hex]7[HexNAc]7[Fuc]1[NeuNAc]1 |
|            | 4+           | 1419.3100        | 1419.2949       | 11               | DGGYESNETDEIFRPGGGDMR     | [Hex]7[HexNAc]6[Fuc]1[NeuNAc]3 |
|            | 4+           | 1470.0669        | 1470.0648       | 1                | DGGYESNETDEIFRPGGGDMR     | [Hex]7[HexNAc]7[Fuc]1[NeuNAc]3 |
|            | 4+           | 1361.0754        | 1361.0315       | 32               | DGGYESNETDEIFRPGGGDMR     | [Hex]7[HexNAc]7[Fuc]2[NeuNAc]1 |
|            | 4+           | 1383.5983        | 1383.5395       | 42               | DGGYESNETDEIFRPGGGDMR     | [Hex]9[HexNAc]8[Fuc]1          |
|            |              |                  |                 |                  |                           |                                |
|            | 4+           | 1634.8601        | 1634.8813       | 13               | DGGYESNETDEIFRPGGGDMRDNWR | [Hex]7[HexNAc]6[Fuc]1[NeuNAc]4 |
|            |              |                  |                 |                  |                           |                                |
| gp41       | 2+           | 954.4780         | 954.4696        | 9                | LICTTTPWNTSWSNK           | non-glycosylated               |
|            |              |                  |                 |                  |                           |                                |
|            | 2+           | 1353.1510        | 1353.1325       | 14               | EIDNYTGYYQLIEESQNQEK      | non-glycosylated               |
|            |              |                  |                 |                  |                           |                                |

Table 2. Glycopeptide Compositions of C.1086 gp140 ΔC obtained from LC/ESI-FTICR MS Analysis

| Env Domain | Charge State | Experimental m/z | Theoretical m/z | Mass Error (ppm) | Peptide Sequence                                              | Glycan Composition             |                       |
|------------|--------------|------------------|-----------------|------------------|---------------------------------------------------------------|--------------------------------|-----------------------|
| C1         | 3+           | 1394.6697        | 1394.6415       | 20               | EVHNVWATHACVPTDNPQEMVLAVTENFNFMWK                             | [HexNAc]                       |                       |
|            | 3+           | 1443.3461        | 1443.3292       | 12               | EVHNVWATHACVPTDNPQEMVLAVTENFNFMWK                             | [HexNAc][Fuc]                  |                       |
|            | 4+           | 1259.0699        | 1259.0570       | 10               | EVHNVWATHACVPTDNPQEMVLAVTENFNFMWK                             | [Hex]4[HexNAc]2                |                       |
|            | 4+           | 1346.3445        | 1346.3413       | 2                | EVHNVWATHACVPTDNPQEMVLAVTENFNFMWK                             | [Hex]4[HexNAc]3[Fuc]1          |                       |
|            | 4+           | 1397.1188        | 1397.1111       | 6                | EVHNVWATHACVPTDNPQEMVLAVTENFNFMWK                             | [Hex]4[HexNAc]4[Fuc]1          |                       |
|            | 4+           | 1411.3855        | 1411.3665       | 13               | EVHNVWATHACVPTDNPQEMVLAVTENFNFMWK                             | [Hex]4[HexNAc]5                |                       |
|            | 4+           | 1447.9102        | 1447.8809       | 20               | EVHNVWATHACVPTDNPQEMVLAVTENFNFMWK                             | [Hex]4[HexNAc]5[Fuc]1          |                       |
|            | 4+           | 1498.6544        | 1498.6508       | 2                | EVHNVWATHACVPTDNPQEMVLAVTENFNFMWK                             | [Hex]4[HexNAc]6[Fuc]1          |                       |
|            | 4+           | 1571.5147        | 1571.4247       | 57               | EVHNVWATHACVPTDNPQEMVLAVTENFNFMWK                             | [Hex]4[HexNAc]6[Fuc]1[NeuNAc]1 |                       |
|            | 4+           | 1299.5717        | 1299.5701       | 1                | EVHNVWATHACVPTDNPQEMVLAVTENFNFMWK                             | [Hex]5[HexNAc]2                |                       |
|            | 4+           | 1350.3547        | 1350.3400       | 11               | EVHNVWATHACVPTDNPQEMVLAVTENFNFMWK                             | [Hex]5[HexNAc]3                |                       |
|            | 4+           | 1386.8629        | 1386.8545       | 6                | EVHNVWATHACVPTDNPQEMVLAVTENFNFMWK                             | [Hex]5[HexNAc]3[Fuc]1          |                       |
|            | 4+           | 1401.0685        | 1401.1098       | 29               | EVHNVWATHACVPTDNPQEMVLAVTENFNFMWK                             | [Hex]5[HexNAc]4                |                       |
|            | 4+           | 1437.6545        | 1437.6243       | 21               | EVHNVWATHACVPTDNPQEMVLAVTENFNFMWK                             | [Hex]5[HexNAc]4[Fuc]1          |                       |
|            | 4+           | 1510.4195        | 1510.3982       | 14               | EVHNVWATHACVPTDNPQEMVLAVTENFNFMWK                             | [Hex]5[HexNAc]4[Fuc]1[NeuNAc]1 |                       |
|            | 4+           | 1583.1826        | 1583.1720       | 7                | EVHNVWATHACVPTDNPQEMVLAVTENFNFMWK                             | [Hex]5[HexNAc]4[Fuc]1[NeuNAc]2 |                       |
|            | 4+           | 1474.1735        | 1474.1388       | 24               | EVHNVWATHACVPTDNPQEMVLAVTENFNFMWK                             | [Hex]5[HexNAc]4[Fuc]2          |                       |
|            | 4+           | 1451.8779        | 1451.8797       | 1                | EVHNVWATHACVPTDNPQEMVLAVTENFNFMWK                             | [Hex]5[HexNAc]5                |                       |
|            | 4+           | 1488.4390        | 1488.3942       | 30               | EVHNVWATHACVPTDNPQEMVLAVTENFNFMWK                             | [Hex]5[HexNAc]5[Fuc]1          |                       |
|            | 4+           | 1561.1941        | 1561.1680       | 17               | EVHNVWATHACVPTDNPQEMVLAVTENFNFMWK                             | [Hex]5[HexNAc]5[Fuc]1[NeuNAc]1 |                       |
|            | 4+           | 1524.9536        | 1524.9086       | 30               | EVHNVWATHACVPTDNPQEMVLAVTENFNFMWK                             | [Hex]5[HexNAc]5[Fuc]2          |                       |
|            | 4+           | 1502.6304        | 1502.6495       | 13               | EVHNVWATHACVPTDNPQEMVLAVTENFNFMWK                             | [Hex]5[HexNAc]6                |                       |
|            | 4+           | 1539.1291        | 1539.1640       | 23               | EVHNVWATHACVPTDNPQEMVLAVTENFNFMWK                             | [Hex]5[HexNAc]6[Fuc]1          |                       |
|            | 4+           | 1390.8543        | 1390.8532       | 1                | EVHNVWATHACVPTDNPQEMVLAVTENFNFMWK                             | [Hex]6[HexNAc]3                |                       |
|            | 4+           | 1427.3926        | 1427.3677       | 17               | EVHNVWATHACVPTDNPQEMVLAVTENFNFMWK                             | [Hex]6[HexNAc]3[Fuc]1          |                       |
|            | 4+           | 1492.3849        | 1492.3929       | 5                | EVHNVWATHACVPTDNPQEMVLAVTENFNFMWK                             | [Hex]6[HexNAc]5                |                       |
|            | 4+           | 1528.9117        | 1528.9074       | 3                | EVHNVWATHACVPTDNPQEMVLAVTENFNFMWK                             | [Hex]6[HexNAc]5[Fuc]1          |                       |
|            | 4+           | 1601.6487        | 1601.6812       | 20               | EVHNVWATHACVPTDNPQEMVLAVTENFNFMWK                             | [Hex]6[HexNAc]5[Fuc]1[NeuNAc]1 |                       |
|            | 4+           | 1674.5011        | 1674.4551       | 27               | EVHNVWATHACVPTDNPQEMVLAVTENFNFMWK                             | [Hex]6[HexNAc]5[Fuc]1[NeuNAc]2 |                       |
|            | 4+           | 1579.7101        | 1579.6772       | 21               | EVHNVWATHACVPTDNPQEMVLAVTENFNFMWK                             | [Hex]6[HexNAc]6[Fuc]1          |                       |
|            | 4+           | 1518.6790        | 1518.6507       | 19               | EVHNVWATHACVPTDNPQEMVLAVTENFNFMWK                             | [Hex]7[HexNAc]4[Fuc]1          |                       |
|            | 5+           | 1231.5341        | 1231.5327       | 1                | EVHNVWATHACVPTDNPQEMVLAVTENFNFMWK                             | [Hex]5[HexNAc]6[Fuc]1          |                       |
|            | 5+           | 1289.7793        | 1289.7793       | 21               | EVHNVWATHACVPTDNPQEMVLAVTENFNFMWK                             | [Hex]5[HexNAc]6[Fuc]1[NeuNAc]1 |                       |
|            | 5+           | 1272.1455        | 1272.1485       | 2                | EVHNVWATHACVPTDNPQEMVLAVTENFNFMWK                             | [Hex]5[HexNAc]7[Fuc]1          |                       |
|            | 5+           | 1234.7590        | 1234.7316       | 22               | EVHNVWATHACVPTDNPQEMVLAVTENFNFMWK                             | [Hex]6[HexNAc]6                |                       |
|            | 5+           | 1304.5583        | 1304.5591       | 0.6              | EVHNVWATHACVPTDNPQEMVLAVTENFNFMWK                             | [Hex]6[HexNAc]7[Fuc]1          |                       |
|            | 5+           | 1362.7883        | 1362.7782       | 7                | EVHNVWATHACVPTDNPQEMVLAVTENFNFMWK                             | [Hex]6[HexNAc]7[Fuc]1[NeuNAc]1 |                       |
|            | 6+           | 1457.7563        | 1457.6410       | 79               | EVHNVWATHACVPTDNPQEMVLAVTENFNFMWKNDMVEQMH<br>EDIISLWDESLKPCVK | [Hex]9[HexNAc]2                |                       |
|            | 6+           | 1530.6964        | 1530.8421       | 95               | EVHNVWATHACVPTDNPQEMVLAVTENFNFMWKNDMVEQMH<br>EDIISLWDESLKPCVK | [Hex]4[HexNAc]6[Fuc]1[NeuNAc]1 |                       |
|            | C1-V1        | 2+               | 816.9309        | 816.9260         | 6                                                             | LTPLCVTLNCTNVK                 | non-glycosylated      |
|            |              | 2+               | 1263.1075       | 1263.0846        | 18                                                            | LTPLCVTLNCTNVK                 | [Hex]3[HexNAc]2       |
|            |              | 2+               | 1364.6378       | 1364.6243        | 10                                                            | LTPLCVTLNCTNVK                 | [Hex]3[HexNAc]3       |
|            |              | 2+               | 1344.1320       | 1344.1110        | 16                                                            | LTPLCVTLNCTNVK                 | [Hex]4[HexNAc]2       |
|            |              | 2+               | 1445.6809       | 1445.6507        | 21                                                            | LTPLCVTLNCTNVK                 | [Hex]4[HexNAc]3       |
|            |              | 2+               | 1518.7025       | 1518.6796        | 15                                                            | LTPLCVTLNCTNVK                 | [Hex]4[HexNAc]3[Fuc]1 |
| 2+         |              | 1620.2342        | 1620.2193       | 9                | LTPLCVTLNCTNVK                                                | [Hex]4[HexNAc]4 [Fuc]1         |                       |
| 2+         |              | 1721.7802        | 1721.7590       | 12               | LTPLCVTLNCTNVK                                                | [Hex]4[HexNAc]5[Fuc]1          |                       |
| 2+         |              | 1425.1412        | 1425.1374       | 3                | LTPLCVTLNCTNVK                                                | [Hex]5[HexNAc]2                |                       |
| 2+         |              | 1526.6880        | 1526.6771       | 7                | LTPLCVTLNCTNVK                                                | [Hex]5[HexNAc]3                |                       |
| 2+         |              | 1599.7180        | 1599.7060       | 8                | LTPLCVTLNCTNVK                                                | [Hex]5[HexNAc]3[Fuc]1          |                       |
| 2+         |              | 1628.2402        | 1628.2168       | 14               | LTPLCVTLNCTNVK                                                | [Hex]5[HexNAc]4                |                       |
| 2+         |              | 1701.2592        | 1701.2457       | 8                | LTPLCVTLNCTNVK                                                | [Hex]5[HexNAc]4[Fuc]1          |                       |
| 2+         |              | 1846.8033        | 1846.7934       | 5                | LTPLCVTLNCTNVK                                                | [Hex]5[HexNAc]4[Fuc]1[NeuNAc]1 |                       |
| 2+         |              | 1729.7954        | 1729.7565       | 22               | LTPLCVTLNCTNVK                                                | [Hex]5[HexNAc]5                |                       |
| 2+         | 1802.8144    | 1802.7854        | 16              | LTPLCVTLNCTNVK   | [Hex]5[HexNAc]5[Fuc]1                                         |                                |                       |

| Env Domain | Charge State | Experimental m/z | Theoretical m/z | Mass Error (ppm) | Peptide Sequence           | Glycan Composition               |
|------------|--------------|------------------|-----------------|------------------|----------------------------|----------------------------------|
|            | 2+           | 1506.1555        | 1506.1638       | 6                | LTPLCVTLNCTNVK             | [Hex]6[HexNAc]2                  |
|            | 2+           | 1607.7229        | 1607.7035       | 12               | LTPLCVTLNCTNVK             | [Hex]6[HexNAc]3                  |
|            | 2+           | 1680.7595        | 1680.7324       | 16               | LTPLCVTLNCTNVK             | [Hex]6[HexNAc]3[Fuc]1            |
|            | 2+           | 1587.2130        | 1587.1902       | 14               | LTPLCVTLNCTNVK             | [Hex]7[HexNAc]2                  |
|            | 2+           | 1688.7367        | 1688.7299       | 4                | LTPLCVTLNCTNVK             | [Hex]7[HexNAc]3                  |
|            | 2+           | 1668.2261        | 1668.2166       | 6                | LTPLCVTLNCTNVK             | [Hex]8[HexNAc]2                  |
| V1-V2      | 3+           | 1594.7242        | 1594.6901       | 21               | LTPLCVTLNCTNVKGNESDT SEVMK | [Hex]5[HexNAc]5[Fuc]1            |
|            | 4+           | 1476.3842        | 1476.3764       | 5                | LTPLCVTLNCTNVKGNESDT SEVMK | [Hex]6[HexNAc]9[Fuc]2            |
|            | 4+           | 1328.0823        | 1328.0656       | 13               | LTPLCVTLNCTNVKGNESDT SEVMK | [Hex]7[HexNAc]6[Fuc]1            |
|            | 4+           | 1466.1271        | 1466.1198       | 5                | LTPLCVTLNCTNVKGNESDT SEVMK | [Hex]7[HexNAc]8[Fuc]2            |
|            | 4+           | 1516.8799        | 1516.8896       | 6                | LTPLCVTLNCTNVKGNESDT SEVMK | [Hex]7[HexNAc]9[Fuc]2            |
|            | 4+           | 1419.3376        | 1419.3487       | 4                | LTPLCVTLNCTNVKGNESDT SEVMK | [Hex]8[HexNAc]7[Fuc]1            |
|            | 5+           | 1192.7353        | 1192.7069       | 24               | LTPLCVTLNCTNVKGNESDT SEVMK | [Hex]6[HexNAc]10[Fuc]1           |
|            | 5+           | 1181.3269        | 1181.3026       | 21               | LTPLCVTLNCTNVKGNESDT SEVMK | [Hex]6[HexNAc]9[Fuc]2            |
|            | 5+           | 1181.3172        | 1181.3026       | 12               | LTPLCVTLNCTNVKGNESDT SEVMK | [Hex]6[HexNAc]9[Fuc]2            |
|            | 5+           | 1062.6519        | 1062.6540       | 2                | LTPLCVTLNCTNVKGNESDT SEVMK | [Hex]7[HexNAc]6[Fuc]1            |
|            | 5+           | 1173.1190        | 1173.0973       | 18               | LTPLCVTLNCTNVKGNESDT SEVMK | [Hex]7[HexNAc]8[Fuc]2            |
|            | 5+           | 1173.1181        | 1173.0973       | 18               | LTPLCVTLNCTNVKGNESDT SEVMK | [Hex]7[HexNAc]8[Fuc]2            |
|            | 5+           | 1213.7421        | 1213.7131       | 24               | LTPLCVTLNCTNVKGNESDT SEVMK | [Hex]7[HexNAc]9[Fuc]2            |
|            | 5+           | 1213.7258        | 1213.7131       | 10               | LTPLCVTLNCTNVKGNESDT SEVMK | [Hex]7[HexNAc]9[Fuc]2            |
|            | 2+           | 1253.5257        | 1253.4934       | 26               | NCSFK                      | [Hex]3[HexNAc]6[Fuc]1            |
|            | 2+           | 936.3208         | 936.3584        | 5                | NCSFK                      | [Hex]5[HexNAc]2                  |
|            | 2+           | 1212.4930        | 1212.4668       | 22               | NCSFK                      | [Hex]5[HexNAc]4[Fuc]1            |
|            | 2+           | 1599.1688        | 1599.1905       | 14               | LDVVPLNGNSSSSGEYR          | [Hex]4[HexNAc]3[Fuc]1            |
|            | 2+           | 1700.7783        | 1700.7302       | 28               | LDVVPLNGNSSSSGEYR          | [Hex]4[HexNAc]4 [Fuc]1           |
|            | 2+           | 1505.6664        | 1505.6483       | 12               | LDVVPLNGNSSSSGEYR          | [Hex]5[HexNAc]2                  |
|            | 2+           | 1781.7481        | 1781.7566       | 5                | LDVVPLNGNSSSSGEYR          | [Hex]5[HexNAc]4[Fuc]1            |
|            | 2+           | 1927.3232        | 1927.3043       | 10               | LDVVPLNGNSSSSGEYR          | [Hex]5[HexNAc]4[Fuc]1[NeuNAc]1   |
|            | 2+           | 1883.3238        | 1883.2963       | 15               | LDVVPLNGNSSSSGEYR          | [Hex]5[HexNAc]5[Fuc]1            |
|            | 2+           | 1586.6305        | 1586.6747       | 28               | LDVVPLNGNSSSSGEYR          | [Hex]6[HexNAc]2                  |
|            | 3+           | 1298.8553        | 1298.8808       | 20               | LDVVPLNGNSSSSGEYR          | [Hex]4[HexNAc]5[Fuc]1[NeuNAc]1   |
|            | 3+           | 1285.2116        | 1285.2053       | 5                | LDVVPLNGNSSSSGEYR          | [Hex]5[HexNAc]4[Fuc]1[NeuNAc]1   |
|            | 3+           | 1352.9254        | 1352.8984       | 20               | LDVVPLNGNSSSSGEYR          | [Hex]5[HexNAc]5[Fuc]1[NeuNAc]1   |
|            | 3+           | 1528.6548        | 1528.6268       | 18               | LDVVPLNGNSSSSGEYR          | [Hex]7 [HexNAc]6[Fuc]1 [NeuNAc]1 |
|            | 3+           | 1625.6539        | 1625.6586       | 3                | LDVVPLNGNSSSSGEYR          | [Hex]7[HexNAc]6[Fuc]1[NeuNAc]2   |
| V2-C2      | 1+           | 1893.8977        | 1893.8989       | 1                | LINCNTSAITQACP             | [HexNAc]                         |
|            | 2+           | 845.9200         | 845.9161        | 5                | LINCNTSAITQACP             | non-glycosylated                 |
|            | 2+           | 947.4595         | 947.4531        | 7                | LINCNTSAITQACP             | [HexNAc]                         |
|            | 2+           | 1020.5003        | 1020.4847       | 15               | LINCNTSAITQACP             | [HexNAc][Fuc]                    |
|            | 2+           | 845.9200         | 845.9161        | 5                | LINCNTSAITQACP             | non-glycosylated                 |
|            | 2+           | 1292.0762        | 1292.0747       | 1                | LINCNTSAITQACP             | [Hex]3[HexNAc]2                  |
|            | 2+           | 1393.6118        | 1393.6144       | 2                | LINCNTSAITQACP             | [Hex]3[HexNAc]3                  |
|            | 2+           | 1466.6397        | 1466.6434       | 3                | LINCNTSAITQACP             | [Hex]3[HexNAc]3[Fuc]1            |
|            | 2+           | 1568.1863        | 1568.1830       | 2                | LINCNTSAITQACP             | [Hex]3[HexNAc]4[Fuc]1            |
|            | 2+           | 1640.7029        | 1640.7018       | 1                | LINCNTSAITQACP             | [Hex]3[HexNAc]4[NeuNAc]1         |
|            | 2+           | 1669.7028        | 1669.7228       | 12               | LINCNTSAITQACP             | [Hex]3[HexNAc]5[Fuc]1            |
|            | 2+           | 1771.2435        | 1771.2625       | 11               | LINCNTSAITQACP             | [Hex]3[HexNAc]6[Fuc]1            |
|            | 2+           | 1373.0961        | 1373.1012       | 4                | LINCNTSAITQACP             | [Hex]4[HexNAc]2                  |
|            | 2+           | 1474.6432        | 1474.6408       | 2                | LINCNTSAITQACP             | [Hex]4[HexNAc]3                  |
|            | 2+           | 1547.6700        | 1547.6698       | 0.1              | LINCNTSAITQACP             | [Hex]4[HexNAc]3[Fuc]1            |
|            | 2+           | 1576.1823        | 1576.1732       | 6                | LINCNTSAITQACP             | [Hex]4[HexNAc]4                  |
|            | 2+           | 1649.2227        | 1649.2095       | 8                | LINCNTSAITQACP             | [Hex]4[HexNAc]4 [Fuc]1           |
|            | 2+           | 1721.7273        | 1721.7282       | 1                | LINCNTSAITQACP             | [Hex]4[HexNAc]4[NeuNAc]1         |

| Env Domain | Charge State | Experimental m/z | Theoretical m/z | Mass Error (ppm) | Peptide Sequence | Glycan Composition             |
|------------|--------------|------------------|-----------------|------------------|------------------|--------------------------------|
|            | 2+           | 1677.6910        | 1677.7202       | 17               | LINCNTSAITQACPK  | [Hex]4[HexNac]5                |
|            | 2+           | 1750.7589        | 1750.7491       | 6                | LINCNTSAITQACPK  | [Hex]4[HexNac]5[Fuc]1          |
|            | 2+           | 1750.7796        | 1750.7492       | 17               | LINCNTSAITQACPK  | [Hex]4[HexNac]5[Fuc]1          |
|            | 2+           | 1896.2941        | 1896.2969       | 1                | LINCNTSAITQACPK  | [Hex]4[HexNac]5[Fuc]1[NeuNac]1 |
|            | 2+           | 1852.2774        | 1852.2888       | 6                | LINCNTSAITQACPK  | [Hex]4[HexNac]6[Fuc]1          |
|            | 2+           | 1454.1176        | 1454.1275       | 7                | LINCNTSAITQACPK  | [Hex]5[HexNac]2                |
|            | 2+           | 1555.6646        | 1555.6672       | 2                | LINCNTSAITQACPK  | [Hex]5[HexNac]3                |
|            | 2+           | 1628.6904        | 1628.6962       | 4                | LINCNTSAITQACPK  | [Hex]5[HexNac]3[Fuc]1          |
|            | 2+           | 1657.2068        | 1657.2069       | 0.1              | LINCNTSAITQACPK  | [Hex]5[HexNac]4                |
|            | 2+           | 1730.2343        | 1730.2359       | 1                | LINCNTSAITQACPK  | [Hex]5[HexNac]4[Fuc]1          |
|            | 2+           | 1875.7892        | 1875.7836       | 3                | LINCNTSAITQACPK  | [Hex]5[HexNac]4[Fuc]1[NeuNac]1 |
|            | 2+           | 1802.8155        | 1802.7546       | 34               | LINCNTSAITQACPK  | [Hex]5[HexNac]4[NeuNac]1       |
|            | 2+           | 1758.7464        | 1758.7466       | 0.1              | LINCNTSAITQACPK  | [Hex]5[HexNac]5                |
|            | 2+           | 1831.7759        | 1831.7756       | 0.2              | LINCNTSAITQACPK  | [Hex]5[HexNac]5[Fuc]1          |
|            | 2+           | 1933.3094        | 1933.3152       | 3                | LINCNTSAITQACPK  | [Hex]5[HexNac]6[Fuc]1          |
|            | 2+           | 1535.1331        | 1535.1540       | 14               | LINCNTSAITQACPK  | [Hex]6[HexNac]2                |
|            | 2+           | 1636.6862        | 1636.6936       | 5                | LINCNTSAITQACPK  | [Hex]6[HexNac]3                |
|            | 2+           | 1709.7469        | 1709.7226       | 14               | LINCNTSAITQACPK  | [Hex]6[HexNac]3[Fuc]1          |
|            | 2+           | 1811.2783        | 1811.2623       | 9                | LINCNTSAITQACPK  | [Hex]6[HexNac]4[Fuc]1          |
|            | 2+           | 1912.8159        | 1912.8020       | 7                | LINCNTSAITQACPK  | [Hex]6[HexNac]5[Fuc]1          |
|            | 2+           | 1616.2101        | 1616.1804       | 18               | LINCNTSAITQACPK  | [Hex]7[HexNac]2                |
|            | 2+           | 1819.2732        | 1819.2597       | 7                | LINCNTSAITQACPK  | [Hex]7[HexNac]4                |
|            | 2+           | 1697.2033        | 1697.2068       | 2                | LINCNTSAITQACPK  | [Hex]8[HexNac]2                |
|            | 2+           | 1778.2050        | 1778.2332       | 16               | LINCNTSAITQACPK  | [Hex]9[HexNac]2                |
|            |              |                  |                 |                  |                  |                                |
|            | 3+           | 1264.5330        | 1264.5337       | 1                | LINCNTSAITQACPK  | [Hex]4[HexNac]5[Fuc]1[NeuNac]1 |
|            | 3+           | 1361.5554        | 1361.5655       | 7                | LINCNTSAITQACPK  | [Hex]4[HexNac]5[Fuc]1[NeuNac]2 |
|            | 3+           | 1283.5261        | 1283.5409       | 12               | LINCNTSAITQACPK  | [Hex]4[HexNac]6[NeuNac]1       |
|            | 3+           | 1318.5619        | 1318.5513       | 8                | LINCNTSAITQACPK  | [Hex]5[HexNac]5[Fuc]1[NeuNac]1 |
|            | 3+           | 1415.5227        | 1415.5831       | 43               | LINCNTSAITQACPK  | [Hex]5[HexNac]5[Fuc]1[NeuNac]2 |
|            | 3+           | 1289.2201        | 1289.2126       | 6                | LINCNTSAITQACPK  | [Hex]5[HexNac]6[Fuc]1          |
|            | 3+           | 1275.5305        | 1275.5371       | 5                | LINCNTSAITQACPK  | [Hex]6[HexNac]5[Fuc]1          |
|            | 3+           | 1372.5772        | 1372.5689       | 6                | LINCNTSAITQACPK  | [Hex]6[HexNac]5[Fuc]1[NeuNac]1 |
|            | 3+           | 1469.6312        | 1469.6007       | 21               | LINCNTSAITQACPK  | [Hex]6[HexNac]5[Fuc]1[NeuNac]2 |
|            | 3+           | 1343.2458        | 1343.2302       | 12               | LINCNTSAITQACPK  | [Hex]6[HexNac]6[Fuc]1          |
|            | 3+           | 1440.2803        | 1440.2620       | 13               | LINCNTSAITQACPK  | [Hex]6[HexNac]6[Fuc]1[NeuNac]1 |
|            | 3+           | 1634.2914        | 1634.3256       | 21               | LINCNTSAITQACPK  | [Hex]6[HexNac]6[Fuc]1[NeuNac]3 |
|            | 3+           | 1410.9356        | 1410.9233       | 9                | LINCNTSAITQACPK  | [Hex]6[HexNac]7[Fuc]1          |
|            | 3+           | 1261.8821        | 1261.8616       | 16               | LINCNTSAITQACPK  | [Hex]7[HexNac]4[Fuc]1          |
|            | 3+           | 1397.2477        | 1397.2478       | 0.1              | LINCNTSAITQACPK  | [Hex]7[HexNac]6[Fuc]1          |
|            | 3+           | 1494.2720        | 1494.2796       | 5                | LINCNTSAITQACPK  | [Hex]7[HexNac]6[Fuc]1[NeuNac]1 |
|            | 3+           | 1591.3314        | 1591.3114       | 13               | LINCNTSAITQACPK  | [Hex]7[HexNac]6[Fuc]1[NeuNac]2 |
|            | 3+           | 1464.9316        | 1464.9409       | 6                | LINCNTSAITQACPK  | [Hex]7[HexNac]7[Fuc]1          |
|            | 3+           | 1562.0029        | 1561.9727       | 19               | LINCNTSAITQACPK  | [Hex]7[HexNac]7[Fuc]1[NeuNac]1 |
|            | 3+           | 1518.9853        | 1518.9586       | 18               | LINCNTSAITQACPK  | [Hex]8[HexNac]7[Fuc]1          |
|            | 3+           | 1567.3238        | 1567.3044       | 12               | LINCNTSAITQACPK  | [Hex]8[HexNac]7[NeuNac]1       |
|            | 3+           | 1437.6275        | 1437.5899       | 26               | LINCNTSAITQACPK  | [Hex]9[HexNac]5[Fuc]1          |
|            |              |                  |                 |                  |                  |                                |
| C2         | 1+           | 738.3123         | 738.3014        | 15               | CNNK             | [HexNac]                       |
|            |              |                  |                 |                  |                  |                                |
|            | 2+           | 714.2841         | 714.2769        | 10               | CNNK             | [Hex]3[HexNac]2                |
|            | 2+           | 795.3122         | 795.3033        | 11               | CNNK             | [Hex]4[HexNac]2                |
|            | 2+           | 876.3323         | 876.3297        | 3                | CNNK             | [Hex]5[HexNac]2                |
|            | 2+           | 957.3589         | 957.3561        | 3                | CNNK             | [Hex]6[HexNac]2                |
|            | 2+           | 1038.3882        | 1038.3825       | 5                | CNNK             | [Hex]7[HexNac]2                |
|            | 2+           | 1119.4048        | 1119.4089       | 4                | CNNK             | [Hex]8[HexNac]2                |
|            | 2+           | 1200.4365        | 1200.4353       | 1                | CNNK             | [Hex]9[HexNac]2                |
|            |              |                  |                 |                  |                  |                                |
|            | 1+           | 1009.4554        | 1009.4520       | 3                | TFNGTGPCR        | non glycosylated               |
|            | 1+           | 1212.5415        | 1212.5313       | 8                | TFNGTGPCR        | [HexNac]                       |
|            |              |                  |                 |                  |                  |                                |
|            | 2+           | 505.2303         | 505.2296        | 1                | TFNGTGPCR        | non-glycosylated               |
|            | 2+           | 1113.4431        | 1113.4410       | 2                | TFNGTGPCR        | [Hex]5[HexNac]2                |
|            | 2+           | 1194.4726        | 1194.4675       | 4                | TFNGTGPCR        | [Hex]6[HexNac]2                |

| Env Domain | Charge State | Experimental m/z | Theoretical m/z | Mass Error (ppm) | Peptide Sequence                    | Glycan Composition              |
|------------|--------------|------------------|-----------------|------------------|-------------------------------------|---------------------------------|
|            | 2+           | 1275.5083        | 1275.4939       | 11               | TFNGTGPCR                           | [Hex]7[HexNAc]2                 |
|            | 2+           | 1356.5282        | 1356.5203       | 6                | TFNGTGPCR                           | [Hex]8[HexNAc]2                 |
|            | 2+           | 1437.5608        | 1437.5467       | 10               | TFNGTGPCR                           | [Hex]9[HexNAc]2                 |
|            | 3+           | 1207.0045        | 1206.9889       | 13               | NVSTVQCTHGIKPVPVSTQLL LNGSLAEEEEIIR | non-glycosylated                |
|            | 4+           | 1371.6205        | 1371.6521       | 23               | NVSTVQCTHGIKPVPVSTQLL LNGSLAEEEEIIR | [Hex]9[HexNAc]2                 |
|            | 4+           | 1513.6339        | 1513.7050       | 47               | NVSTVQCTHGIKPVPVSTQLL LNGSLAEEEEIIR | [Hex]10[HexNAc]4                |
|            | 4+           | 1594.6837        | 1594.7314       | 30               | NVSTVQCTHGIKPVPVSTQLL LNGSLAEEEEIIR | [Hex]12[HexNAc]4                |
|            | 4+           | 1635.2368        | 1635.2446       | 5                | NVSTVQCTHGIKPVPVSTQLL LNGSLAEEEEIIR | [Hex]13[HexNAc]4                |
|            | 5+           | 1340.8204        | 1340.8077       | 9                | NVSTVQCTHGIKPVPVSTQLL LNGSLAEEEEIIR | [Hex]14[HexNAc]4                |
|            | 5+           | 1373.2330        | 1373.2182       | 11               | NVSTVQCTHGIKPVPVSTQLL LNGSLAEEEEIIR | [Hex]15[HexNAc]4                |
|            | 5+           | 1405.6548        | 1405.6288       | 18               | NVSTVQCTHGIKPVPVSTQLL LNGSLAEEEEIIR | [Hex]16[HexNAc]4                |
|            | 5+           | 1438.0554        | 1438.0394       | 11               | NVSTVQCTHGIKPVPVSTQLL LNGSLAEEEEIIR | [Hex]17[HexNAc]4                |
|            | 5+           | 1470.3994        | 1470.4499       | 34               | NVSTVQCTHGIKPVPVSTQLL LNGSLAEEEEIIR | [Hex]18[HexNAc]4                |
|            | 1+           | 990.4890         | 990.4851        | 4                | SENLTNNAK                           | non-glycosylated                |
|            | 1+           | 1193.5656        | 1193.5590       | 6                | SENLTNNAK                           | [HexNAc]                        |
|            | 2+           | 941.8973         | 941.9048        | 8                | SENLTNNAK                           | [Hex]3[HexNAc]2                 |
|            | 2+           | 1022.9312        | 1022.9312       | 0                | SENLTNNAK                           | [Hex]4[HexNAc]2                 |
|            | 2+           | 1103.9598        | 1103.9576       | 2                | SENLTNNAK                           | [Hex]5[HexNAc]2                 |
|            | 2+           | 1205.4958        | 1205.4973       | 1                | SENLTNNAK                           | [Hex]5[HexNAc]3                 |
|            | 2+           | 1184.9876        | 1184.9840       | 3                | SENLTNNAK                           | [Hex]6[HexNAc]2                 |
|            | 2+           | 1286.5289        | 1286.5237       | 4                | SENLTNNAK                           | [Hex]6[HexNAc]3                 |
|            | 2+           | 1266.0087        | 1266.0104       | 1                | SENLTNNAK                           | [Hex]7[HexNAc]2                 |
|            | 2+           | 1367.5452        | 1367.5501       | 4                | SENLTNNAK                           | [Hex]7[HexNAc]3                 |
|            | 2+           | 1347.0403        | 1347.0368       | 3                | SENLTNNAK                           | [Hex]8[HexNAc]2                 |
| C2-V3      | 2+           | 1282.6946        | 1282.6717       | 18               | TIIVHLNESVNIIVCTRPNNNTR             | non-glycosylated                |
|            | 3+           | 990.8458         | 990.8365        | 9                | TIIVHLNESVNIIVCTRPNNNTR             | [HexNAc]2                       |
|            | 3+           | 1609.7254        | 1609.7217       | 2                | TIIVHLNESVNIIVCTRPNNNTR             | [Hex]5[HexNAc]5[Fuc]1[NeuNAc]1  |
|            | 3+           | 1904.4621        | 1904.4886       | 14               | TIIVHLNESVNIIVCTRPNNNTR             | [Hex]11[HexNAc]6[Fuc]1          |
|            | 3+           | 1890.7743        | 1890.8131       | 21               | TIIVHLNESVNIIVCTRPNNNTR             | [Hex]12[HexNAc]5[Fuc]1          |
|            | 3+           | 1958.5929        | 1958.5062       | 44               | TIIVHLNESVNIIVCTRPNNNTR             | [Hex]12[HexNAc]6[Fuc]1          |
|            | 4+           | 1519.9215        | 1519.9013       | 13               | TIIVHLNESVNIIVCTRPNNNTR             | [Hex]12[HexNAc]7[Fuc]1          |
|            | 4+           | 1509.7305        | 1509.6447       | 57               | TIIVHLNESVNIIVCTRPNNNTR             | [Hex]13[HexNAc]6[Fuc]1          |
|            | 4+           | 1600.9471        | 1600.9277       | 12               | TIIVHLNESVNIIVCTRPNNNTR             | [Hex]14[HexNAc]7[Fuc]1          |
|            | 4+           | 1469.1562        | 1469.1315       | 17               | TIIVHLNESVNIIVCTRPNNNTR             | [Hex]12[HexNAc]6[Fuc]1          |
|            | 4+           | 1519.8966        | 1519.9013       | 3                | TIIVHLNESVNIIVCTRPNNNTR             | [Hex]12[HexNAc]7[Fuc]1          |
|            | 4+           | 1458.8341        | 1458.8748       | 28               | TIIVHLNESVNIIVCTRPNNNTR             | [Hex]13[HexNAc]5[Fuc]1          |
|            | 4+           | 1509.6629        | 1509.6447       | 12               | TIIVHLNESVNIIVCTRPNNNTR             | [Hex]13[HexNAc]6[Fuc]1          |
|            | 4+           | 1560.4195        | 1560.4145       | 3                | TIIVHLNESVNIIVCTRPNNNTR             | [Hex]13[HexNAc]7[Fuc]1          |
|            | 4+           | 1633.2486        | 1633.1884       | 37               | TIIVHLNESVNIIVCTRPNNNTR             | [Hex]13[HexNAc]7[Fuc]1[NeuNAc]1 |
|            | 4+           | 1499.4001        | 1499.3880       | 8                | TIIVHLNESVNIIVCTRPNNNTR             | [Hex]14[HexNAc]5[Fuc]1          |
|            | 4+           | 1550.1906        | 1550.1579       | 21               | TIIVHLNESVNIIVCTRPNNNTR             | [Hex]14[HexNAc]6[Fuc]1          |
|            | 4+           | 1622.9858        | 1622.9611       | 15               | TIIVHLNESVNIIVCTRPNNNTR             | [Hex]14[HexNAc]6[Fuc]1[NeuNAc]1 |
|            | 4+           | 1600.9013        | 1600.9277       | 16               | TIIVHLNESVNIIVCTRPNNNTR             | [Hex]14[HexNAc]7[Fuc]1          |
|            | 4+           | 1673.7383        | 1673.7016       | 22               | TIIVHLNESVNIIVCTRPNNNTR             | [Hex]14[HexNAc]7[Fuc]1[NeuNAc]1 |
|            | 3+           | 1763.1398        | 1763.1147       | 14.2             | TIIVHLNESVNIIVCTRPNNNTRK            | [Hex]11[HexNAc]4                |
| V3-C3      | 1+           | 1200.5454        | 1200.5426       | 2                | QAHCNINESK                          | non-glycosylated                |
|            | 1+           | 1403.6344        | 1403.6165       | 13               | QAHCNINESK                          | [HexNAc]                        |
|            | 2+           | 600.7751         | 600.7749        | 0.3              | QAHCNINESK                          | non-glycosylated                |
|            | 2+           | 702.3201         | 702.3119        | 12               | QAHCNINESK                          | [HexNAc]                        |
|            | 2+           | 965.9174         | 965.9071        | 11               | QAHCNINESK                          | [Hex]2[HexNAc]2                 |
|            | 2+           | 1046.9460        | 1046.9335       | 12               | QAHCNINESK                          | [Hex]3[HexNAc]2                 |
|            | 2+           | 1127.9740        | 1127.9600       | 12               | QAHCNINESK                          | [Hex]4[HexNAc]2                 |
|            | 2+           | 1208.9964        | 1208.9863       | 8                | QAHCNINESK                          | [Hex]5[HexNAc]2                 |



| Env Domain | Charge State | Experimental m/z | Theoretical m/z | Env Domain | Charge State      | Experimental m/z               |
|------------|--------------|------------------|-----------------|------------|-------------------|--------------------------------|
|            | 2+           | 1290.0224        | 1290.0128       | 7          | QAHCNINESK        | [Hex]6[HexNAc]2                |
|            | 2+           | 1371.0406        | 1371.0392       | 1          | QAHCNINESK        | [Hex]7[HexNAc]2                |
|            | 2+           | 1452.0802        | 1452.0656       | 10         | QAHCNINESK        | [Hex]8[HexNAc]2                |
|            | 2+           | 1813.2599        | 1813.2644       | 2          | QAHCNINESKWNNTLQK | [Hex]7[HexNAc]2                |
|            | 3+           | 1101.1538        | 1101.1435       | 9          | QAHCNINESKWNNTLQK | [Hex]5[HexNAc]2                |
|            | 3+           | 1168.8578        | 1168.8366       | 18         | QAHCNINESKWNNTLQK | [Hex]5[HexNAc]3                |
|            | 3+           | 1209.1856        | 1209.1787       | 6          | QAHCNINESKWNNTLQK | [Hex]7[HexNAc]2                |
|            | 3+           | 1222.8690        | 1222.8542       | 12         | QAHCNINESKWNNTLQK | [Hex]6[HexNAc]3                |
|            | 3+           | 1290.5695        | 1290.5473       | 17         | QAHCNINESKWNNTLQK | [Hex]6[HexNAc]4                |
|            | 3+           | 1344.5836        | 1344.5649       | 14         | QAHCNINESKWNNTLQK | [Hex]7[HexNAc]4                |
|            | 3+           | 1398.5856        | 1398.5825       | 2          | QAHCNINESKWNNTLQK | [Hex]8[HexNAc]4                |
|            | 3+           | 1452.6005        | 1452.6002       | 0.2        | QAHCNINESKWNNTLQK | [Hex]9[HexNAc]4                |
|            | 3+           | 1506.6206        | 1506.6177       | 2          | QAHCNINESKWNNTLQK | [Hex]10[HexNAc]4               |
|            | 3+           | 1560.6307        | 1560.6353       | 3          | QAHCNINESKWNNTLQK | [Hex]11[HexNAc]4               |
|            | 3+           | 1614.6661        | 1614.6529       | 8          | QAHCNINESKWNNTLQK | [Hex]12[HexNAc]4               |
|            | 3+           | 1668.6613        | 1668.6706       | 6          | QAHCNINESKWNNTLQK | [Hex]13[HexNAc]4               |
|            | 3+           | 1722.6771        | 1722.6882       | 6          | QAHCNINESKWNNTLQK | [Hex]14[HexNAc]4               |
|            | 3+           | 1776.7134        | 1776.7058       | 4          | QAHCNINESKWNNTLQK | [Hex]15[HexNAc]4               |
|            | 3+           | 1830.7353        | 1830.7233       | 7          | QAHCNINESKWNNTLQK | [Hex]16[HexNAc]4               |
|            | 3+           | 1884.7660        | 1884.7410       | 13         | QAHCNINESKWNNTLQK | [Hex]17[HexNAc]4               |
| C3         | 1+           | 903.4709         | 903.4683        | 3          | WNNTLQK           | non-glycosylated               |
|            | 1+           | 1106.5367        | 1106.5422       | 5          | WNNTLQK           | [HexNAc]                       |
|            | 2+           | 898.3947         | 898.3964        | 2          | WNNTLQK           | [Hex]3[HexNAc]2                |
|            | 2+           | 979.4308         | 979.4229        | 8          | WNNTLQK           | [Hex]4[HexNAc]2                |
|            | 2+           | 1060.4566        | 1060.4492       | 7          | WNNTLQK           | [Hex]5[HexNAc]2                |
|            | 2+           | 1162.0012        | 1161.9889       | 11         | WNNTLQK           | [Hex]5[HexNAc]3                |
|            | 2+           | 1307.5603        | 1307.5366       | 18         | WNNTLQK           | [Hex]5[HexNAc]3[NeuNAc]1       |
|            | 2+           | 1438.0827        | 1438.0973       | 10         | WNNTLQK           | [Hex]5[HexNAc]5[Fuc]1          |
|            | 2+           | 1656.1812        | 1656.1637       | 11         | WNNTLQK           | [Hex]5[HexNAc]5[NeuNAc]2       |
|            | 2+           | 1141.4739        | 1141.4757       | 2          | WNNTLQK           | [Hex]6[HexNAc]2                |
|            | 2+           | 1242.9988        | 1243.0153       | 13         | WNNTLQK           | [Hex]6[HexNAc]3                |
|            | 2+           | 1388.5888        | 1388.5630       | 19         | WNNTLQK           | [Hex]6[HexNAc]3[NeuNAc]1       |
|            | 2+           | 1222.4997        | 1222.5021       | 2          | WNNTLQK           | [Hex]7[HexNAc]2                |
|            | 2+           | 1324.0813        | 1324.0417       | 30         | WNNTLQK           | [Hex]7[HexNAc]3                |
|            | 2+           | 1303.5190        | 1303.5285       | 7          | WNNTLQK           | [Hex]8[HexNAc]2                |
|            | 2+           | 1384.5489        | 1384.5549       | 4          | WNNTLQK           | [Hex]9[HexNAc]2                |
| C3-V4      | 2+           | 1045.9563        | 1045.9492       | 7          | GEFFYCNTSDFLNGTYR | non-glycosylated               |
|            | 2+           | 1654.1442        | 1654.1606       | 10         | GEFFYCNTSDFLNGTYR | [Hex]5[HexNAc]2                |
|            | 3+           | 1508.5996        | 1508.5838       | 10         | GEFFYCNTSDFLNGTYR | [Hex]10[HexNAc]4               |
|            | 3+           | 1562.6247        | 1562.6014       | 15         | GEFFYCNTSDFLNGTYR | [Hex]11[HexNAc]4               |
|            | 3+           | 1616.6165        | 1616.6190       | 2          | GEFFYCNTSDFLNGTYR | [Hex]12[HexNAc]4               |
|            | 3+           | 1670.6493        | 1670.6366       | 8          | GEFFYCNTSDFLNGTYR | [Hex]13[HexNAc]4               |
|            | 3+           | 1724.6838        | 1724.6542       | 17         | GEFFYCNTSDFLNGTYR | [Hex]14[HexNAc]4               |
|            | 3+           | 1778.6607        | 1778.6718       | 6          | GEFFYCNTSDFLNGTYR | [Hex]15[HexNAc]4               |
|            | 3+           | 1832.7039        | 1832.6894       | 8          | GEFFYCNTSDFLNGTYR | [Hex]16[HexNAc]4               |
|            | 3+           | 1886.6275        | 1886.7070       | 32         | GEFFYCNTSDFLNGTYR | [Hex]17[HexNAc]4               |
| V4         | 2+           | 1130.9861        | 1130.9636       | 20         | NGTYNHTGR         | [Hex]3[HexNAc]3[Fuc]1          |
|            | 2+           | 1232.5459        | 1232.5032       | 35         | NGTYNHTGR         | [Hex]3[HexNAc]4[Fuc]1          |
|            | 2+           | 1212.0058        | 1211.9900       | 13         | NGTYNHTGR         | [Hex]4[HexNAc]3[Fuc]1          |
|            | 2+           | 1313.5396        | 1313.5297       | 8          | NGTYNHTGR         | [Hex]4[HexNAc]4 [Fuc]1         |
|            | 2+           | 1292.9670        | 1293.0164       | 38         | NGTYNHTGR         | [Hex]5[HexNAc]3[Fuc]1          |
|            | 2+           | 1394.5667        | 1394.5561       | 8          | NGTYNHTGR         | [Hex]5[HexNAc]4[Fuc]1          |
|            | 2+           | 1540.1057        | 1540.1038       | 1          | NGTYNHTGR         | [Hex]5[HexNAc]4[Fuc]1[NeuNAc]1 |
|            | 2+           | 1496.0887        | 1496.0958       | 5          | NGTYNHTGR         | [Hex]5[HexNAc]5[Fuc]1          |
|            | 2+           | 1577.1243        | 1577.1222       | 1          | NGTYNHTGR         | [Hex]6[HexNAc]5[Fuc]1          |
|            | 2+           | 1722.7267        | 1722.6699       | 33         | NGTYNHTGR         | [Hex]6[HexNAc]5[Fuc]1[NeuNAc]1 |
|            | 2+           | 1678.6736        | 1678.6619       | 7          | NGTYNHTGR         | [Hex]6[HexNAc]6[Fuc]1          |

| Env Domain | Charge State | Experimental m/z | Theoretical m/z | Mass Error (ppm) | Peptide Sequence | Glycan Composition             |
|------------|--------------|------------------|-----------------|------------------|------------------|--------------------------------|
|            | 2+           | 1382.0713        | 1382.0402       | 23               | NGTYNHTGR        | [Hex]7[HexNac]3                |
|            | 2+           | 1686.5797        | 1686.6593       | 47               | NGTYNHTGR        | [Hex]7[HexNac]6                |
|            | 2+           | 1759.7112        | 1759.6883       | 13               | NGTYNHTGR        | [Hex]7[HexNac]6[Fuc]1          |
|            |              |                  |                 |                  |                  |                                |
|            | 3+           | 943.7288         | 943.7153        | 14               | NGTYNHTGR        | [Hex]4[HexNac]5[Fuc]1          |
|            | 3+           | 949.0543         | 949.0470        | 8                | NGTYNHTGR        | [Hex]5[HexNac]5                |
|            | 3+           | 1094.7839        | 1094.7647       | 18               | NGTYNHTGR        | [Hex]5[HexNac]5[Fuc]1[NeuNac]1 |
|            | 3+           | 1065.4395        | 1065.4260       | 13               | NGTYNHTGR        | [Hex]5[HexNac]6[Fuc]1          |
|            | 3+           | 1245.8571        | 1245.8141       | 35               | NGTYNHTGR        | [Hex]6[HexNac]5[Fuc]1[NeuNac]2 |
|            | 3+           | 1342.8183        | 1342.8459       | 21               | NGTYNHTGR        | [Hex]6[HexNac]5[Fuc]1[NeuNac]3 |
|            | 3+           | 1167.7907        | 1167.7895       | 1                | NGTYNHTGR        | [Hex]6[HexNac]6[NeuNac]1       |
|            | 3+           | 1270.5169        | 1270.4931       | 19               | NGTYNHTGR        | [Hex]7[HexNac]6[Fuc]1[NeuNac]1 |
|            | 3+           | 1367.5176        | 1367.5249       | 5                | NGTYNHTGR        | [Hex]7[HexNac]6[Fuc]1[NeuNac]2 |
|            | 3+           | 1464.5866        | 1464.5567       | 20               | NGTYNHTGR        | [Hex]7[HexNac]6[Fuc]1[NeuNac]3 |
|            | 3+           | 1241.1780        | 1241.1544       | 19               | NGTYNHTGR        | [Hex]7[HexNac]7[Fuc]1          |
|            | 3+           | 1338.2001        | 1338.1861       | 10               | NGTYNHTGR        | [Hex]7[HexNac]7[Fuc]1[NeuNac]1 |
|            | 3+           | 1295.1954        | 1295.1720       | 18               | NGTYNHTGR        | [Hex]8[HexNac]7[Fuc]1          |
|            |              |                  |                 |                  |                  |                                |
| V4-C4      | 1+           | 1411.6889        | 1411.6678       | 15               | SSNGTITLQCK      | [HexNac]                       |
|            | 1+           | 1557.7385        | 1557.7311       | 5                | SSNGTITLQCK      | [HexNac][Fuc]                  |
|            |              |                  |                 |                  |                  |                                |
|            | 2+           | 1050.9639        | 1050.9592       | 4                | SSNGTITLQCK      | [Hex]3[HexNac]2                |
|            | 2+           | 1152.5060        | 1152.4989       | 6                | SSNGTITLQCK      | [Hex]3[HexNac]3                |
|            | 2+           | 1225.5300        | 1225.5279       | 2                | SSNGTITLQCK      | [Hex]3[HexNac]3[Fuc]1          |
|            | 2+           | 1254.0374        | 1254.0386       | 1                | SSNGTITLQCK      | [Hex]3[HexNac]4                |
|            | 2+           | 1327.0768        | 1327.0675       | 7                | SSNGTITLQCK      | [Hex]3[HexNac]4[Fuc]1          |
|            | 2+           | 1399.5768        | 1399.5863       | 7                | SSNGTITLQCK      | [Hex]3[HexNac]4[NeuNac]1       |
|            | 2+           | 1428.5698        | 1428.6073       | 26               | SSNGTITLQCK      | [Hex]3[HexNac]5[Fuc]1          |
|            | 2+           | 1132.0072        | 1131.9857       | 19               | SSNGTITLQCK      | [Hex]4[HexNac]2                |
|            | 2+           | 1233.5113        | 1233.5253       | 11               | SSNGTITLQCK      | [Hex]4[HexNac]3                |
|            | 2+           | 1306.5697        | 1306.5543       | 12               | SSNGTITLQCK      | [Hex]4[HexNac]3[Fuc]1          |
|            | 2+           | 1452.0991        | 1452.1020       | 2                | SSNGTITLQCK      | [Hex]4[HexNac]3[Fuc]1[NeuNac]1 |
|            | 2+           | 1335.0647        | 1335.0650       | 0.2              | SSNGTITLQCK      | [Hex]4[HexNac]4                |
|            | 2+           | 1408.0936        | 1408.0940       | 0.3              | SSNGTITLQCK      | [Hex]4[HexNac]4[Fuc]1          |
|            | 2+           | 1553.6214        | 1553.6417       | 13               | SSNGTITLQCK      | [Hex]4[HexNac]4[Fuc]1[NeuNac]1 |
|            | 2+           | 1480.6265        | 1480.6127       | 9                | SSNGTITLQCK      | [Hex]4[HexNac]4[NeuNac]1       |
|            | 2+           | 1436.5484        | 1436.6047       | 39               | SSNGTITLQCK      | [Hex]4[HexNac]5                |
|            | 2+           | 1509.6312        | 1509.6336       | 2                | SSNGTITLQCK      | [Hex]4[HexNac]5[Fuc]1          |
|            | 2+           | 1582.1549        | 1582.1524       | 2                | SSNGTITLQCK      | [Hex]4[HexNac]5[NeuNac]1       |
|            | 2+           | 1611.1700        | 1611.1733       | 2                | SSNGTITLQCK      | [Hex]4[HexNac]6[Fuc]1          |
|            | 2+           | 1213.0134        | 1213.0120       | 1                | SSNGTITLQCK      | [Hex]5[HexNac]2                |
|            | 2+           | 1314.5392        | 1314.5517       | 10               | SSNGTITLQCK      | [Hex]5[HexNac]3                |
|            | 2+           | 1387.5813        | 1387.5807       | 0.4              | SSNGTITLQCK      | [Hex]5[HexNac]3[Fuc]1          |
|            | 2+           | 1533.1279        | 1533.1284       | 0.3              | SSNGTITLQCK      | [Hex]5[HexNac]3[Fuc]1[NeuNac]1 |
|            | 2+           | 1416.0878        | 1416.0914       | 3                | SSNGTITLQCK      | [Hex]5[HexNac]4                |
|            | 2+           | 1561.6151        | 1561.6391       | 15               | SSNGTITLQCK      | [Hex]5[HexNac]4 [NeuNac]1      |
|            | 2+           | 1489.1191        | 1489.1204       | 1                | SSNGTITLQCK      | [Hex]5[HexNac]4[Fuc]1          |
|            | 2+           | 1634.6702        | 1634.6681       | 1                | SSNGTITLQCK      | [Hex]5[HexNac]4[Fuc]1[NeuNac]1 |
|            | 2+           | 1780.2138        | 1780.2158       | 1                | SSNGTITLQCK      | [Hex]5[HexNac]4[Fuc]1[NeuNac]2 |
|            | 2+           | 1517.6355        | 1517.6311       | 3                | SSNGTITLQCK      | [Hex]5[HexNac]5                |
|            | 2+           | 1590.6588        | 1590.6601       | 1                | SSNGTITLQCK      | [Hex]5[HexNac]5[Fuc]1          |
|            | 2+           | 1736.2029        | 1736.2078       | 3                | SSNGTITLQCK      | [Hex]5[HexNac]5[Fuc]1[NeuNac]1 |
|            | 2+           | 1663.1710        | 1663.1788       | 5                | SSNGTITLQCK      | [Hex]5[HexNac]5[NeuNac]1       |
|            | 2+           | 1793.7412        | 1793.7394       | 1                | SSNGTITLQCK      | [Hex]5[HexNac]7[Fuc]1          |
|            | 2+           | 1294.0669        | 1294.0385       | 22               | SSNGTITLQCK      | [Hex]6[HexNac]2                |
|            | 2+           | 1395.5896        | 1395.5781       | 8                | SSNGTITLQCK      | [Hex]6[HexNac]3                |
|            | 2+           | 1468.6062        | 1468.6071       | 1                | SSNGTITLQCK      | [Hex]6[HexNac]3[Fuc]1          |
|            | 2+           | 1541.1287        | 1541.1258       | 2                | SSNGTITLQCK      | [Hex]6[HexNac]3[NeuNac]1       |
|            | 2+           | 1570.1493        | 1570.1468       | 2                | SSNGTITLQCK      | [Hex]6[HexNac]4[Fuc]1          |
|            | 2+           | 1671.7148        | 1671.6865       | 17               | SSNGTITLQCK      | [Hex]6[HexNac]5[Fuc]1          |
|            | 2+           | 1817.2692        | 1817.2342       | 19               | SSNGTITLQCK      | [Hex]6[HexNac]5[Fuc]1[NeuNac]1 |
|            | 2+           | 1773.2267        | 1773.2262       | 0.3              | SSNGTITLQCK      | [Hex]6[HexNac]6[Fuc]1          |
|            | 2+           | 1651.1571        | 1651.1732       | 10               | SSNGTITLQCK      | [Hex]7[HexNac]4[Fuc]1          |
|            | 2+           | 1537.0838        | 1537.1177       | 22               | SSNGTITLQCK      | [Hex]9[HexNac]2                |

| Env Domain | Charge State | Experimental m/z | Theoretical m/z | Mass Error (ppm) | Peptide Sequence         | Glycan Composition             |
|------------|--------------|------------------|-----------------|------------------|--------------------------|--------------------------------|
|            | 2+           | 1617.6166        | 1617.7073       | 56               | SSNGTITLQCKIK            | [Hex]6[HexNac]4                |
|            | 2+           | 1495.6842        | 1495.6544       | 19.9             | SSNGTITLQCKIK            | [Hex]7[HexNac]2                |
|            | 2+           | 1576.7074        | 1576.6808       | 16.9             | SSNGTITLQCKIK            | [Hex]8[HexNac]2                |
| C4         | 2+           | 1314.7243        | 1314.7069       | 13               | AIYAPPIEGEITCNSNITGLLLLR | non-glycosylated               |
|            | 2+           | 1416.2454        | 1416.2438       | 1                | AIYAPPIEGEITCNSNITGLLLLR | [HexNac]                       |
|            | 3+           | 1174.2408        | 1174.2461       | 5                | AIYAPPIEGEITCNSNITGLLLLR | [Hex]3[HexNac]2                |
|            | 3+           | 1228.2596        | 1228.2637       | 3                | AIYAPPIEGEITCNSNITGLLLLR | [Hex]4[HexNac]2                |
|            | 3+           | 1282.2972        | 1282.2813       | 12               | AIYAPPIEGEITCNSNITGLLLLR | [Hex]5[HexNac]2                |
|            | 3+           | 1336.2822        | 1336.2989       | 12               | AIYAPPIEGEITCNSNITGLLLLR | [Hex]6[HexNac]2                |
|            | 3+           | 1390.3380        | 1390.3165       | 15               | AIYAPPIEGEITCNSNITGLLLLR | [Hex]7[HexNac]2                |
|            | 3+           | 1444.3408        | 1444.3341       | 5                | AIYAPPIEGEITCNSNITGLLLLR | [Hex]8[HexNac]2                |
|            | 3+           | 1498.3570        | 1498.3517       | 4                | AIYAPPIEGEITCNSNITGLLLLR | [Hex]9[HexNac]2                |
| C4-V5      | 3+           | 1467.6110        | 1467.5747       | 25               | DGGQSNETNDTETFRPGGGDMR   | [Hex]5[HexNac]4[Fuc]1[NeuNac]1 |
|            | 3+           | 1589.2554        | 1589.2854       | 19               | DGGQSNETNDTETFRPGGGDMR   | [Hex]6[HexNac]5[Fuc]1[NeuNac]1 |
|            | 3+           | 1589.2124        | 1589.2854       | 46               | DGGQSNETNDTETFRPGGGDMR   | [Hex]6[HexNac]5[Fuc]1[NeuNac]1 |
|            | 3+           | 1559.9834        | 1559.9467       | 24               | DGGQSNETNDTETFRPGGGDMR   | [Hex]6[HexNac]6[Fuc]1          |
|            | 3+           | 1808.0363        | 1808.0279       | 5                | DGGQSNETNDTETFRPGGGDMR   | [Hex]7[HexNac]6[Fuc]1[NeuNac]2 |
|            | 3+           | 1686.9943        | 1686.9891       | 3                | DGGQSNETNDTETFRPGGGDMR   | [Hex]8[HexNac]7                |
| gp41       | 2+           | 932.4607         | 932.4565        | 5                | LICTTAVPWNSSWSNK         | non-glycosylated               |
|            | 2+           | 1033.9893        | 1033.9940       | 4                | LICTTAVPWNSSWSNK         | [HexNac]                       |
|            | 2+           | 1540.6498        | 1540.6679       | 12               | LICTTAVPWNSSWSNK         | [Hex]5[HexNac]2                |
|            | 2+           | 1621.7143        | 1621.6943       | 12               | LICTTAVPWNSSWSNK         | [Hex]6[HexNac]2                |
|            | 3+           | 1468.6654        | 1468.6169       | 33               | LICTTAVPWNSSWSNK         | [Hex]6[HexNac]7[Fuc]1          |
|            | 3+           | 1400.9953        | 1400.9237       | 51               | LICTTAVPWNSSWSNK         | [Hex]6[HexNac]6[Fuc]1          |
|            | 3+           | 1308.5377        | 1308.5517       | 11               | LICTTAVPWNSSWSNK         | [Hex]5[HexNac]4[Fuc]1[NeuNac]1 |
|            | 2+           | 1824.2753        | 1824.2315       | 24               | SQNEIWGNMTWMQWDR         | [Hex]5[HexNac]3[Fuc]1          |
|            | 3+           | 1284.1343        | 1284.1832       | 38               | SQNEIWGNMTWMQWDR         | [Hex]5[HexNac]4[Fuc]1          |
|            | 3+           | 1381.1681        | 1381.2150       | 34               | SQNEIWGNMTWMQWDR         | [Hex]5[HexNac]4[Fuc]1[NeuNac]1 |
|            | 2+           | 1350.0962        | 1350.0818       | 11               | EINNYTNTIYR              | [Hex]3[HexNac]4                |
|            | 2+           | 1228.0729        | 1228.0289       | 36               | EINNYTNTIYR              | [Hex]4[HexNac]2                |
|            | 2+           | 1548.1897        | 1548.1452       | 29               | EINNYTNTIYR              | [Hex]4[HexNac]3[Fuc]1[NeuNac]1 |
|            | 2+           | 1309.0577        | 1309.0553       | 2                | EINNYTNTIYR              | [Hex]5[HexNac]2                |
|            | 2+           | 1410.5980        | 1410.5950       | 2                | EINNYTNTIYR              | [Hex]5[HexNac]3                |
|            | 2+           | 1483.6325        | 1483.6239       | 6                | EINNYTNTIYR              | [Hex]5[HexNac]3[Fuc]1          |
|            | 2+           | 1585.1691        | 1585.1636       | 3                | EINNYTNTIYR              | [Hex]5[HexNac]4[Fuc]1          |
|            | 2+           | 1491.6293        | 1491.6214       | 5                | EINNYTNTIYR              | [Hex]6[HexNac]3                |
|            | 2+           | 1564.6446        | 1564.6503       | 4                | EINNYTNTIYR              | [Hex]6[HexNac]3[Fuc]1          |
|            | 2+           | 1637.1576        | 1637.1691       | 7                | EINNYTNTIYR              | [Hex]6[HexNac]3[NeuNac]1       |
|            | 2+           | 1552.1623        | 1552.1345       | 18               | EINNYTNTIYR              | [Hex]8[HexNac]2                |
